# The role of traction in membrane curvature generation

H. Alimohamadi\*<sup>1</sup>, R. Vasan\*<sup>1</sup>, J.E. Hassinger<sup>2</sup>, J.C. Stachowiak<sup>3</sup> and P. Rangamani\*<sup>1</sup>

<sup>1</sup>Department of Mechanical and Aerospace Engineering, University of California San Diego

<sup>2</sup>Biophysics Graduate Program, University of California Berkeley

<sup>3</sup>Department of Biomedical Engineering, University of Texas at Austin

June 10, 2018

## Abstract

Curvature of biological membranes can be generated by a variety of molecular mechanisms including protein scaffolding, compositional heterogeneity, and cytoskeletal forces. These mechanisms have the net effect of generating tractions (force per unit length) on the bilayer that are translated into distinct shapes of the membrane. Here, we demonstrate how the local shape of the membrane can be used to infer the traction acting locally on the membrane. We show that buds and tubes, two common membrane deformations studied in trafficking processes, have different traction distributions along the membrane and that these tractions are specific to the molecular mechanism used to generate these shapes. Furthermore, we show that the magnitude of an axial force applied to the membrane as well as that of an effective line tension can be calculated from these tractions. Finally, we consider the sensitivity of these quantities with respect to uncertainties in material properties and follow with a discussion on sources of uncertainty in membrane shape.

**Keywords** Membrane curvature, Lipid bilayer, Helfrich energy, Budding, Tether formation, Traction, Line tension.

---

\*prangamani@ucsd.edu

## 21 **Introduction**

22 Cell shape plays an important role in regulating a diverse set of biological functions including devel-  
23 opment, differentiation, motility, and signal transduction (McMahon and Gallop, 2005; Roux et al.,  
24 2005; Neves et al., 2008; Rangamani et al., 2013; Aimon et al., 2014). Additionally, the ability of  
25 cellular membranes to bend and curve is critical for a variety of cellular functions such as membrane  
26 trafficking processes, cytokinetic abscission, and filopodial extension (Mukherjee and Maxfield, 2000;  
27 Mattila and Lappalainen, 2008). In order to carry out these functions, cells harness diverse mecha-  
28 nisms of curvature generation like compositional heterogeneity (Baumgart et al., 2003; Römer et al.,  
29 2007), protein scaffolding (Karotki et al., 2011a; Kirchhausen, 2012), insertion of amphipathic helices  
30 into the bilayer (Ford et al., 2002; Lee et al., 2005), and forces exerted by the cytoskeleton (Giardini  
31 et al., 2003; Carlsson, 2018) (Fig. 1). Reconstituted and synthetic membrane systems also exhibit a  
32 wide range of shapes in response to different curvature-inducing mechanisms as seen from steric pres-  
33 sure due to protein crowding (Lipowsky, 1995; Stachowiak et al., 2012; Derganc and Čopič, 2016).

34 It is well-known that these various mechanisms of curvature generation induce surface stresses;  
35 expressions for these stresses have been derived using either variational methods (Jenkins, 1977;  
36 Capovilla and Guven, 2002b, 2004) or by using auxiliary variables that enforce geometric constraints  
37 (Guyen, 2004; Fournier, 2007). These studies have established the physics underlying membrane  
38 stresses and clearly explained how these traction forces can be interpreted in linear deformations and  
39 in idealized geometries (Guyen, 2004; Fournier, 2007). However, many physiologically relevant mem-  
40 brane shapes display large curvatures (Farsad and De Camilli, 2003; Kozlov et al., 2014), non-linear  
41 deformations (Holzapfel et al., 1996; Einstein et al., 2003), and heterogeneous membrane composition  
42 (Lingwood and Simons, 2010; Busch et al., 2015). How stresses are distributed along such shapes is  
43 not yet fully understood. In this article, we discuss how theory can help us evaluate membrane stresses  
44 based on the observed shape.

## 45 **Shape as a reporter of force**

46 Many biomechanics textbooks present the postulate that the relationship between the applied load  
47 and the resulting deformation can be obtained if a constitutive relationship between the stress and  
48 strain of a material is given (Mofrad and Kamm, 2010; Phillips et al., 2012; Fung, 2013). Indeed,  
49 the idea that shape can be considered a reporter of the applied force is an idea as old as continuum

50 mechanics (Todhunter, 1886). A classical example illustrating how shape can be used as a reporter  
51 of force in biology can be understood by studying the shape of a vesicle or a cell using micropipette  
52 aspiration (Hochmuth, 2000; Lee and Liu, 2014). This method is used to calculate the tension of  
53 bilayer membranes in vesicles and cortical tension in cells through Laplace's law. Since the pressure  
54 applied by the micropipette is known, tension can be calculated using a force balance at the membrane.

55 Lee *et al.* suggested that membrane shape itself acts as a reporter of applied forces (Lee et al.,  
56 2008) and calculated the axial force required to form membrane tethers in optical tweezer experi-  
57 ments based on shape, given the material properties of the membranes (See Fig. 2 in (Lee et al.,  
58 2008)). They showed that the calculated value of force was in excellent agreement with their experi-  
59 mental measurements. Separately, Baumgart and colleagues showed that the Gaussian modulus has a  
60 strong effect on membrane budding in phase-separated vesicles and its magnitude can be obtained by  
61 analyzing the geometry of the vesicle (Baumgart et al., 2005).

62 An additional layer of complexity in how shape and forces are related arises through the hetero-  
63 geneous composition of the lipid bilayer in cells. Most protein binding to cellular membranes are  
64 local processes (Kishimoto et al., 2011; Karotki et al., 2011b; Buser and Drubin, 2013). Even in *in*  
65 *vitro* studies, several groups have shown that protein adsorption on lipid domains can alter the lateral  
66 pressure profile on the bilayer and induce tubulation (Stachowiak et al., 2012; Lipowsky, 2013; Zhao  
67 et al., 2013). Recently, theoretical studies have shown that adsorbed proteins give rise to spontaneous  
68 surface tension (Lipowsky, 2013; Rangamani et al., 2014b). Therefore, there is a need to understand  
69 how applied forces and membrane heterogeneity can regulate the local stresses on the membrane.  
70 Going beyond the approximation of tension using Laplace's law, we sought to understand the local  
71 stresses in tubes and buds – two geometries that are critical to many cellular phenomena. Using the  
72 well-established Helfrich model (Helfrich, 1973; Bassereau et al., 2014) for membrane bending as a  
73 framework, we illustrate how local forces can be understood from the shape of the membrane. We  
74 close with an extended discussion of how advances in image analysis and measurement of material  
75 properties can aid in our understanding of how traction can be calculated from the curvature of the  
76 membrane.

## 77 **Local stresses in the membrane: governing equations**

### 78 **Surface stress tensor and traction calculation**

79 A general force balance for a surface  $\omega$ , bounded by a curve  $\partial\omega$ , is (Fig. 2)

$$\int_{\omega} p \mathbf{n} da + \int_{\partial\omega} \tilde{\mathbf{f}} dt + \mathbf{F} = 0, \quad (1)$$

80 where  $t = r(s)\theta$  is the length along the curve of revolution perimeter (see Fig. 2),  $p$  is the pressure  
81 difference across the membrane,  $\tilde{\mathbf{f}}$  is the traction along the curve of revolution  $t$  and  $\mathbf{F}$  is any externally  
82 applied force on the membrane. Along any circumferential curve on the membrane at constant  $z$ , the  
83 traction is given by (Agrawal and Steigmann, 2009a)

$$\tilde{\mathbf{f}} = f_{\nu} \boldsymbol{\nu} + f_n \mathbf{n} + f_{\tau} \boldsymbol{\tau}. \quad (2)$$

84 The values of  $f_{\nu}$ ,  $f_n$  and  $f_{\tau}$  will depend on the particular form of strain energy we choose to  
85 depict the membrane properties (See Fig. 2 for definitions of the forces and the vectors). We choose  
86 the Helfrich Hamiltonian as the constitutive relationship in this case and use a modified version that  
87 includes spatially-varying spontaneous curvature  $C(\theta^{\alpha})$ , (Steigmann, 1999; Agrawal and Steigmann,  
88 2009a; Hassinger et al., 2017),

$$W = \kappa [H - C(\theta^{\alpha})]^2 + \kappa_G K. \quad (3)$$

89 where  $W$  is the energy per unit area,  $\kappa$  is the bending modulus,  $H$  is the local mean curvature,  $\kappa_G$   
90 is the Gaussian modulus,  $K$  is the local Gaussian curvature and  $\theta^{\alpha}$  denotes the surface coordinates.  
91 This form of the energy density accommodates the local heterogeneity in the spontaneous curvature  
92  $C$ . Note that  $W$  differs from the standard Helfrich energy by a factor of 2, which is accounted for  
93 by using the value of  $\kappa$  to be twice that of the standard bending modulus typically encountered in  
94 the literature (See Table S1 for notation). A more in-depth investigation of the role of anisotropic  
95 spontaneous curvature using a version of the Helfrich energy that includes deviatoric curvature can be  
96 found in the Supplement (Eq. S11, (Iglič et al., 2006; Lokar et al., 2012)).

97 While Eqs. 1 & 3 are general expressions that are independent of coordinates, for illustrative  
98 purposes we will restrict further analysis to rotationally symmetric membrane deformations for ease



99 of analysis (Fig. 2). Using principles of force balance one can derive the “shape” equation and the  
 100 tangential balance equation for the Helfrich energy (see Supplement for detailed derivations). The  
 101 traction, which is the force per unit length, across any boundary of constant  $z$  is given by

$$\underbrace{\tilde{f}_n}_{\text{Normal traction}} = -\underbrace{\kappa(H' - C')}_{\text{curvature gradient}}, \quad (4a)$$

$$\underbrace{\tilde{f}_\nu}_{\text{Tangential traction}} = \underbrace{\kappa(H - C)(H - C - \psi')}_{\text{curvature}} + \underbrace{\lambda}_{\text{tension}} \quad (4b)$$

102

103 where  $\psi$  is the angle the membrane makes with the horizontal (see Fig. 2),  $\lambda$  is the local membrane  
 104 tension, and  $()'$  denotes a derivative with respect to arc-length  $s$ , e.g.  $H' = dH/ds$ .

105 From the above equations, we see that the normal traction,  $\tilde{f}_n$ , captures the effect of curvature  
 106 gradients while the tangential traction,  $\tilde{f}_\nu$ , captures the effect of local membrane tension and curvature.  
 107 A complete derivation of the stress balance and the governing equations of motion is presented in the  
 108 Supplement. Additional derivations of traction including spatially heterogenous bending and Gaussian  
 109 moduli, asymptotic approximations for small radius as well as anisotropic spontaneous curvature are  
 110 presented in the Supplement.

## 111 Interpretation of traction

112 Traction, which has the units of force per unit length, was initially introduced by physicists as a re-  
 113 sult of Noether’s theorem (Capovilla and Guven, 2002a; Guven, 2004; Capovilla and Guven, 2004).  
 114 This theorem states that for any elastic surface that is in equilibrium, there exists a unique traction  
 115 distribution such that its divergence is conserved (Guyen, 2004). Mechanically, the traction distribu-  
 116 tion gives us information about the response of the membrane to externally applied loading, including  
 117 forces acting on the membrane or protein-mediated bending. Numerous studies have derived these  
 118 equations mathematically and sought to explain them in a biophysical context. Capovilla and Gu-  
 119 ven (Capovilla and Guven, 2002b,a, 2004) invoked the action-reaction law – if one were to cut the  
 120 membrane along any curve,  $\tilde{f}_n$  and  $\tilde{f}_\nu$  are the forces per unit length of the curve in the normal and  
 121 tangential directions respectively that the membrane on one side of the cut exerts on the other. Further-  
 122 more, the expressions for tractions (Eq. 4) reduce to their corresponding fluid analogues for negligible

123 membrane rigidity and pressure difference. Thus, we can interpret the normal and tangential tractions  
 124 as follows – the tangential traction distribution tracks the gradient in ‘effective’ surface tension (dis-  
 125 cussed below) while the normal traction distribution contains information regarding a force balance  
 126 performed normal to the membrane at every point. Further physical interpretations of these quantities  
 127 can be obtained based on the particular biological phenomena, as illustrated below by examining two  
 128 fundamental membrane deformations – tubes and buds.

### 129 **Axial force and effective line tension**

130 We obtain the formulae for traction in the axial and radial directions obtained by projecting the normal  
 131 and tangential tractions onto these axes (Eqs. S28) (full derivation in Supplement). We can then  
 132 calculate the magnitude of an applied axial force on the membrane by integrating the axial component  
 133 of the traction (Eq. S28b) along the circumference of the bounding curve  $\partial\omega$ , yielding

$$\tilde{F}_z = 2\pi r \left[ \underbrace{\kappa(H' - C') \cos \psi + \kappa(H - C)(H - C - \psi') \sin \psi}_{\text{Bending contribution}} + \underbrace{\lambda \sin \psi}_{\text{Tension contribution}} \right], \quad (5)$$

134 where  $\tilde{F}_z$  is the axial force generated in response to an external load.

135 An energy per unit length,  $\xi$ , associated with deformations in the radial direction can be found by  
 136 integrating the radial traction along the curve  $\partial\omega$  (Fig. 2), as

$$\xi = 2\pi r \left[ \underbrace{\kappa(H - C)(H - C - \psi') \cos \psi}_{\text{Curvature contribution}} + \underbrace{\lambda \cos \psi}_{\text{Tension contribution}} + \underbrace{\kappa(H' - C') \sin \psi}_{\text{Curvature gradient contribution}} \right]. \quad (6)$$

137  $\xi$  can be interpreted as an “effective” line tension (Seifert, 1997). While line tension denotes the force  
 138 acting at the boundary of two interfaces – e.g. inward force for a liquid droplet on a hydrophobic  
 139 substrate and an outward force on a hydrophilic substrate (Buehrle et al., 2002; Liu et al., 2006), the  
 140 “effective” line tension predicts a general resistive force acting at every point opposing any change in  
 141 the membrane length, regardless of a phase boundary. This ‘force’ is not an actual radial force but  
 142 represents the change in energy with respect to the characteristic length scale (McDargh et al., 2016);  
 143 going forward, we refer to it as an energy per unit length.

## 144 **Illustrative examples of traction along the membrane**

145 For spherical vesicles, where the mean curvature is constant and in the absence of spontaneous cur-  
146 vature curvature ( $C = 0$ ) and homogeneous composition, the normal traction  $\tilde{f}_n$  is zero because  
147 curvature gradients are zero (Eq. 4a), and the tangential traction,  $\tilde{f}_\nu$ , reduces to the membrane tension  
148 ( $\lambda$ ) (Eq. 4b). This is consistent with previous discussions of membrane tension (Rangamani et al.,  
149 2014b). For surfaces with zero mean curvature (minimal surfaces such as catenoids (Powers et al.,  
150 2002)) and homogeneous composition,  $\tilde{f}_n$  is zero and  $\tilde{f}_\nu$  is equal to  $\lambda$ , also consistent with the in-  
151 terpretation of membrane tension for these surfaces (Powers et al., 2002; Chabanon and Rangamani,  
152 2018).

153 What happens when the mean curvature is not constant or if the membrane is not homogeneous  
154 in composition? Given a membrane shape and a constitutive relationship, Eqs. 4a and 4b tell us that  
155 we can calculate the local stresses along the membrane. One way of studying shapes is to use images  
156 from high resolution microscopy of membrane vesicles of known composition. However, these images  
157 can be noisy and obtaining the local curvature and curvature gradients requires fitting the curve with  
158 multiple splines or other functions (Lee et al., 2008). Another way to generate membrane shapes  
159 is to use simulations. Since our goal is to illustrate the concept of local tractions, we use shapes  
160 generated from simulations to elucidate how the normal and tangential tractions are distributed along  
161 the membrane. The traction distributions are not the direct output of these simulations; instead they  
162 are calculated *a posteriori* using the output shapes from the simulations and the membrane properties,  
163 similarly to how one would calculate these distributions from experimentally observed membrane  
164 shapes.

## 165 **Tether formation due to applied load – revisiting a classical membrane deformation**

166 The formation of membrane tethers in response to a point load is a classic example of force-mediated  
167 membrane deformation (Roux et al., 2002; Smith et al., 2004) that has been extensively studied both  
168 experimentally (Waugh, 1982; Heinrich et al., 1999) and theoretically (Derényi et al., 2002; Powers  
169 et al., 2002; Prévost et al., 2017; Simunovic et al., 2017). This comes as no surprise because a tether  
170 is a starting point for understanding membrane deformation in a wide variety of biological contexts  
171 including endocytosis, filopodia formation, tubulation in the endoplasmic reticulum, etc. We used  
172 this example to validate our method and to identify how normal and tangential tractions contribute

173 to the formation of tethers. We generated a membrane tether by applying a localized force at the  
174 pole to mimic a point load, and solved the shape equation for homogeneous bilayers in axisymmetric  
175 coordinates (Eq. S17), for a membrane tension of 0.02 pN/nm (simulation details provided in the  
176 Supplement).

177 The normal and tangential traction distributions along the tether are shown in Fig. 3. The absolute  
178 value of the normal tractions are highest at the pole as the applied force increases. The membrane  
179 curves away from the applied force along the region over which it is applied, and conforms to a  
180 stable cylindrical geometry along the rest of the tether and a flat region at the base. The tangential  
181 traction has a large positive value along the cylindrical portion of the tether (Fig. 3C) showing that the  
182 membrane resists stretching as the tube is pulled out. The tether cap has a negative tangential traction  
183 because of the membrane tension heterogeneity (Eq. S10) induced by the application of the load. The  
184 corresponding radial and axial traction components (Eqs. S28a, S28b) plotted along the equilibrium  
185 shapes are shown in Fig. S1.

186 As expected, the negative of the axial force (Eq. 5), evaluated at the base of the geometry, exactly  
187 matches the force-extension relationship for tether formation obtained directly from the simulation  
188 (see Fig. 3B), showing that the local stresses along a membrane shape can help us evaluate the applied  
189 forces. We also considered the role of a large turgor pressure that opposes the membrane invagina-  
190 tion, mimicking the situation in yeast endocytosis. (Basu et al., 2014; Aghamohammadzadeh and  
191 Ayscough, 2009; Dmitrieff and Nédélec, 2015). Transmembrane pressure results in an additional term  
192 in the axial traction (see Eq. S29). As seen in Figs. S2 and S3, an excellent match between the applied  
193 load and the calculated force from the traction distribution is obtained for simulations with pressure by  
194 modifying our expression for force. We further verified that our results are independent of the system  
195 constraints (i.e. conserved arc length or surface area), confirming that changes in membrane area does  
196 not change the validity of our approach (Fig. S7).

197 What information do the tangential tractions contain? The tangential tractions play an important  
198 role in squeezing the membrane neck and holding the cylindrical configuration during membrane elon-  
199 gation (see Fig. S1). Consequently in Fig. 3D, the point of zero ‘effective’ line tension corresponds  
200 to the dotted cylinder, which has a radius of  $R_0 = \frac{1}{2} \sqrt{\frac{\kappa}{\lambda_0}}$  (Derényi et al., 2002). This equilibrium  
201 cylinder has no curvature gradient, leading to zero ‘effective’ line tension. The calculated values of  
202 energy per unit length inside the cylinder are negative while those outside are positive, suggesting that  
203 the “effective” line tension indicates the extent of deviation from the idealized cylindrical geometry.

204 A negative energy per unit length here refers to the fact that there exists a negative radial force at that  
205 point (McDargh et al., 2016). Additionally, the value of  $\xi$  at the neck is  $\sim 3$  pN, providing an estimate  
206 of the effective line tension required to form a neck in tethers.

## 207 **Traction along tubes is highly dependent on mechanisms of membrane deformation and** 208 **on resistive force**

209 Do all membrane tubes have the same traction distribution? In order to answer this question, we com-  
210 pared membrane shapes that look superficially similar and calculated the traction profiles along them  
211 (Fig. 4). We show that different tubes can have very different tractions depending on the mechanism  
212 of membrane deformation and the resistive forces that are acting on them. We begin by compar-  
213 ing electron micrographs of yeast endocytic invaginations in mutant cells lacking the BAR-domain  
214 proteins Bzz1, Rvs167 and wild-type cells (Kishimoto et al., 2011) (Figs. 4A and 4E respectively).  
215 Because force from actin assembly is the primary driver of membrane deformation in this process  
216 (Kukulski et al., 2012), we assume that the deformation in the mutant cell is a result of having only  
217 an applied force at the tip of the invagination (Fig. 4B). In the wild-type, we assume that the BAR  
218 domain proteins induce an anisotropic spontaneous curvature locally (e.g. tubulation) (Frost et al.,  
219 2009) (Fig. 4F, see Fig. S10 and Supplement for implementation and traction calculation). These  
220 assumptions between the mutant and wildtype cells are simplifications, but serve to illustrate the dif-  
221 ferences in traction distribution. In particular, the tangential traction in the wild-type case (Fig. 4H)  
222 is nearly zero near the tip of the bud and highest near the base, in stark contrast to the mutant, which  
223 lacks additional curvature generation and therefore is high all along the tube (Fig. 4D). These results  
224 suggest that the BAR domain proteins can act as a barrier to the stresses induced by the axial force,  
225 which is consistent with recent experimental evidence that points to a potential scission mechanism  
226 (Simunovic et al., 2017). Indeed, a negative normal traction at the tube base in Fig. 4G demonstrates  
227 a tendency for the neck to shrink in size.

228 The previous simulations were conducted using a membrane tension that is applicable to mam-  
229 malian cells (Sens and Plastino, 2015). However, turgor pressure is thought to be the primary opposing  
230 force in yeast endocytosis (Aghamohammadzadeh and Ayscough, 2009). To investigate the role of tur-  
231 gor pressure, we performed a simulation in which the value of the turgor pressure was set such that the  
232 radius of the resulting tube (Fig. 4J) would match that of the tube generated using membrane tension

233 (Fig. 4B). The normal traction distribution in this case (Fig. 4K) is strikingly different; there is a  
234 large negative normal traction at the base of the tube indicating that turgor pressure acts to induce the  
235 formation of a neck. The tangential traction (Fig. 4L) is no longer uniform on the tube and is again  
236 greatest just above the narrowing of the tube at the base. Though these simulations are only meant to  
237 capture the approximate shapes of the membrane in these different cases and not necessarily match  
238 the length scales or parameter values with respect to the biological situations, they serve to illustrate  
239 the point that the quantitative differences in the deformations against membrane tension and turgor  
240 pressure can be realized by the calculating the local tractions along the membrane shape.

## 241 **Formation of buds due to spontaneous curvature is characterized by emergent line ten-** 242 **sion**

243 Phase separation and lipid domains are classical mechanisms of bud formation and vesiculation (Rich-  
244 mond et al., 2011). Previously, we and others have shown that protein-induced heterogeneity on  
245 the membrane can be modeled using a spontaneous curvature field (Steigmann, 1999; Agrawal and  
246 Steigmann, 2009b; Rangamani et al., 2014b). We used this framework to investigate the nature of  
247 membrane tractions generated during budding due to a spontaneous curvature field. We conducted  
248 simulations for a constant area of the spontaneous curvature field  $A = 10,000 \text{ nm}^2$  and varied the ex-  
249 tent of spontaneous curvature,  $C$ , from 0 to  $0.032 \text{ nm}^{-1}$  (Fig. 5A). We calculated the value of traction  
250 for three distinct shapes – a shallow invagination, a U-shaped bud, and a closed  $\Omega$ - shaped bud (Fig.  
251 5B-D).

252 The normal traction is negative along the applied spontaneous curvature field indicating a sharper  
253 change in mean curvature compared to the applied spontaneous curvature ( $H' > C'$  in Eq. 4a). At the  
254 neck, where  $\psi = \frac{\pi}{2}$ , normal traction is maximum and acts purely inward, representing the tendency  
255 of the membrane to form small necks. The tangential traction shows a change in sign from positive  
256 to negative as the neck radius becomes smaller. This change in sign highlights the critical role of  
257 the gradient in tangential traction in the formation of narrow necks (Hassinger et al., 2017) (Figs.  
258 5B-D). The dashed circles represent the equilibrium spherical vesicles calculated by Helfrich energy  
259 minimization ( $R_{\text{vesicle}} = \frac{\kappa C}{\lambda_0 + \kappa C^2}$ ) (Hassinger et al., 2017). The positive tangential traction in tent-  
260 like small deformations indicates that the membrane resists the bending deformation; however, in the  
261 U-shaped and closed buds, the negative tangential traction along the cap acts to pull the membrane

262 inward and favors the adoption of a highly curved shape. The radial and axial tractions distribution  
263 along all three shapes are shown in Fig. S4 which reveals that bud formation by spontaneous curvature  
264 is purely driven by radial traction while axial traction is zero everywhere.

265 Each equilibrium bud divides the membrane into two domains – (i) the membrane inside the bud  
266 with negative energy per unit length that bends to form a bud and (ii) the membrane outside the bud  
267 with positive energy per unit length that resists such a deformation. Previously, both modeling and  
268 experimental studies have shown that in heterogeneous membranes, line tension can be sufficient for  
269 scission of endocytic pits (Liu et al., 2006) or the formation of buds in vesicle experiments (Baumgart  
270 et al., 2003, 2005). In the case of an applied spontaneous curvature field, the expression of energy per  
271 unit length (Eq. S31) can be interpreted as the actual line tension at the interface of the two phases.  
272 Through the process of bud formation, line tension undergoes a sign change from positive (acting  
273 outward) to negative (acting inward), effectively transitioning from a tension-dominated regime to a  
274 curvature-gradient dominated regime (Fig. 6). This transition from positive to negative line tension  
275 with increasing value of spontaneous curvature is also observed in other studies (Dan and Safran,  
276 1998). The value of the energy per unit length at the interface varies between -5 pN to 5 pN, which  
277 is of the order of the reported interfacial line tension between coexisting phases in lipid bilayers  
278 (Lipowsky, 1992; Liu et al., 2006).

279 There are two other factors that could affect the traction distribution along the bud – (i) a change in  
280 area of the membrane during budding and (ii) spatial heterogeneity in membrane moduli. To explore  
281 how the change of membrane area influences bud formation mediated by protein-induced spontaneous  
282 curvature, we conducted a simulation with a fixed available arc-length instead of area (Fig. S6).  
283 Similar to the case of a homogenous membrane with fixed area, the energy per unit length at the  
284 interface changes sign from positive to negative in a range of -5 pN to 5 pN. However, protein  
285 segregation on the membrane can lead to heterogeneity in material properties such as bending moduli  
286 (Jin et al., 2006). In order to investigate the effect of this spatial heterogeneity in the bending moduli  
287 along the membrane surface, we repeated the budding simulation from Fig. 5, assuming that the  
288 bending rigidity along the spontaneous curvature field is 7.5 times larger than the bending rigidity  
289 of the bare membrane (Fig. S5) (Jin et al., 2006). Because the membrane is stiffer and harder to  
290 bend, a wider neck is formed at  $C = -0.032 \text{ nm}^{-1}$  compared to the case of a uniform membrane (Fig.  
291 S5A) (Hassinger et al., 2017). This membrane resistance to deformation is observed as a uniform  
292 positive normal traction everywhere along the membrane (Fig. S5A). To compare the behavior of the



293 line tension at the edge of the spontaneous curvature field, we ran the budding simulation with the  
294 spatially heterogeneous bending moduli up to a larger value of spontaneous curvature ( $C = -0.035$   
295  $\text{nm}^{-1}$ ), in order to have the same range of neck radii as the uniform membrane (Fig. 5E). We can  
296 see that the trend of line tension variation versus the spontaneous curvature is almost the same in  
297 both cases (Fig. S5E), changing sign from positive to negative followed by a critical point indicating  
298 the transition from a U to an  $\Omega$ -shaped bud. However, the magnitude of line tension is different  
299 in the two cases. For small magnitudes of spontaneous curvature (tent shaped buds), the average  
300 difference in line tension is  $\sim 1$  pN. But for large magnitudes of spontaneous curvature ( $C \geq -0.0275$   
301  $\text{nm}^{-1}$ ,  $\Omega$  shaped buds), the average line tension for a rigid coat is  $\sim 4$  pN larger than the line tension  
302 in a homogeneous membrane. This larger value of line tension in a heterogeneous membrane has  
303 been reported in various experimental measurements (Lipowsky, 1992; Tian et al., 2007), and other  
304 theoretical studies (Kuzmin et al., 2005; Semrau and Schmidt, 2009).

### 305 **Traction distribution is a signature of distinct budding mechanisms**

306 Conceptually, there are two primary means by which membrane buds can be maintained: an accumula-  
307 tion of protein or lipid-induced spontaneous curvature favoring a spherical geometry, or a constriction  
308 force that pinches the membrane into a budded shape. In Fig. 7, we illustrate the traction distribu-  
309 tion in these two cases. The upper row represents spontaneous curvature-induced budding, meant to  
310 resemble vesicle coat protein (such as the coatomer COPII) mediated budding from the endoplasmic  
311 reticulum ((Robinson et al., 2015), Fig. 7A) and the lower row represents budding due to a local  
312 constriction force via a contractile ring in budding yeast ((Mozdy et al., 2000), Fig. 7E). Although  
313 the two simulated shapes are superficially similar, the traction distributions are quite different. The  
314 normal traction distribution for spontaneous curvature budding (Fig. 7C) is similar to the one seen in  
315 Fig. 5 where there is a large negative traction at the bud neck, indicating forces acting to minimize  
316 the neck radius. Conversely, for the constriction force budding, the normal traction is highly positive  
317 at the neck (Fig. 7G), indicating a resistance by the membrane to the applied force. The tangential  
318 tractions (Fig. 7D and H) are also quite different. For example, moving from the top to the bottom of  
319 the vesicle, the tangential traction in the case of the protein-induced spontaneous curvature budding  
320 is initially negative and then positive after the neck (Fig. 7D). However, for the constriction force  
321 mediated budding, the tangential traction is positive at first and then negative after the neck (Fig. 7D).



322 This difference in the gradient of tangential traction at the membrane neck serves as a signature for  
323 spontaneous curvature mediated vs force mediated bud formation. Thus, the mechanism of curvature  
324 generation can be related to the computed traction profile, and some *a priori* knowledge can help  
325 uncover these differences (see Figs. 4 and 7).

326 Another mechanism of maintaining membrane buds (specific to endocytosis) is through actin-  
327 mediated forces where an actin network polymerizes in a ring at the base of the plasma membrane  
328 (PM) invagination and is connected to the coat, driving inward movement (Picco et al., 2015; Walani  
329 et al., 2015). We have previously considered these cytoskeletal effects in (Hassingier et al., 2017) and  
330 show here that the applied forces can be matched to axial forces calculated from traction (Figs. S8,  
331 S9) for two orientations of the applied force.

### 332 **Sensitivity analysis and sources of errors**

333 In principle, calculating force from shape is at the heart of stress-strain relationships. However, there  
334 are some fundamental challenges associated with sources of errors in such a calculation. There are two  
335 main sources of errors – error in the measurement of material properties (membrane bending modulus  
336 and membrane tension), and error in the measurement of shape. We present some simple analysis of  
337 these sources of error in what follows.

### 338 **Parametric sensitivity analysis of material properties**

339 Ideally, one would like to define a sensitivity index similar to the parametric sensitivity conducted for  
340 systems of chemical reactions, where the sensitivity of a quantity  $F_i$  with respect to a parameter  $k_j$  is  
341 given by  $S_{i,j} = \frac{\partial F_i}{\partial k_j}$  (Varma et al., 2005). However, since we wish to simultaneously explore the effect  
342 of both the bending modulus and tension, we use a simple linear calculation of error. Uncertainties in  
343 either of these quantities will result in an uncertainty in the traction as well as the calculated axial force  
344 and energy per unit length (Eqs. 5 and 6) Here, we assume that the bending modulus and membrane  
345 tension can be written as  $\kappa = \kappa_{\text{mean}} \pm \kappa_{\text{error}}$  and  $\lambda = \lambda_{\text{mean}} \pm \lambda_{\text{error}}$  respectively. Then, by virtue of  
346 the relationships in Eqs. 5 and 6, we can estimate the error in the axial force and the energy per unit  
347 length as

$$F_{z,\text{error}} = \pm 2\pi r \left( \kappa_{\text{error}}(H' - C') \cos(\psi) + \kappa_{\text{error}}(H - C)(H - C - \psi') \sin(\psi) + \lambda_{\text{error}} \sin(\psi) \right), \quad (7a)$$

$$\xi_{\text{error}} = \pm 2\pi r \left( \kappa_{\text{error}}(H - C)(H - C - \psi') \cos(\psi) + \kappa_{\text{error}}(H' - C') \sin(\psi) + \lambda_{\text{error}} \cos(\psi) \right) \quad (7b)$$

348

349 These equations allow us to interrogate how errors in both membrane moduli and membrane ten-  
350 sion affect the error in forces. We took our control to be the output of tubulation and budding simula-  
351 tions described in Figs. 3 and 5, respectively. Then, we conducted the same simulations over a range  
352 of bending moduli and membrane tensions to reflect a range in error of these two quantities. From  
353 these simulations, we (i) calculated the applied force using Eq. 5 for the tube pulling simulations at  
354 the peak of the force displacement plot and (ii) the energy per unit length at the phase boundary using  
355 Eq. 6 for the budding simulations at the same value of spontaneous curvature. Fig. 8A and 8C show  
356 the result of this procedure for a force and energy per unit length respectively that have been normal-  
357 ized to the output from the initial simulations (as indicated by X.) As expected, separately varying  
358 either bending modulus or membrane tension is translated into an error in the force and energy per  
359 unit length, though the magnitude of the final error does not match that of the input error due to the  
360 coupling to shape (Eq. 5 and 6). Next, we investigate the nonlinear effect of varying bending modulus  
361 and membrane tension simultaneously on the computed errors. Interestingly, we see that in some cases  
362 the error in one parameter is compensated for by the error in the other, as highlighted by the dashed  
363 lines which indicate a band of less than 10% total error. This is due to the intrinsic scaling in both  
364 tubulation (Derényi et al., 2002; Dmitrieff and Nédélec, 2015) and budding (Hassingier et al., 2017)  
365 with respect to bending modulus and membrane tension. Overall, we observe that the final error is not  
366 simply a sum of the errors in the two material properties and compensatory behaviours can result (Eq.  
367 7, Fig. 8A, C).

368 In the previous calculation, when the membrane modulus and tension were varied, both the char-  
369 acteristic length of the membrane and its shape were affected. We conducted another analysis, where  
370 the shape of the membrane was fixed to the control and an error was introduced in the values of bend-  
371 ing modulus and membrane tension during the calculation of tractions (Figs. 8B and D). Interestingly,  
372 we found that the error in the axial force is independent of the error in membrane tension (Fig. 8B).  
373 This is a consequence of calculating the axial force at a point at the base of the deformation where

374 the angle  $\psi$  is almost zero and so, the tension term contributes less. If one were to instead perform  
375 the force balance at a point on the membrane where  $\psi$  is not zero, the error in the force would again  
376 depend on the error in both bending modulus and tension (Fig. S11). This, in principle could be  
377 beneficial in the sense that one could minimize the error in determining the axial force by evaluating  
378 it at a location where the total error is minimized (e.g. if uncertainty in membrane tension is large,  
379 calculate the applied force at the base of the invagination since the calculation is insensitive to error in  
380 membrane tension at this location).

381 In contrast, the phase boundary is located at a particular position on the membrane curve and so  
382 must be evaluated at that point. We observe that the dependence of the error in the energy per unit  
383 length on bending modulus and membrane tension is no longer non-linear (Fig. 8D) as we fix the  
384 shape of the membrane and vary the material properties. Further, we see that the primary dependence  
385 of the error in the energy per unit length comes from the error in the bending modulus. Finally, we  
386 once again see that the total error is less than the sum of its two contributions due to the coupling to  
387 the local membrane shape, as expected from Eq. 7.

### 388 **Errors in quantification of shape metrics**

389 One of the largest source of errors in calculating forces arises from imaging modalities for shape itself.  
390 Uncertainty in the shape of the membrane will depend on the method used to extract shapes from  
391 microscopy images. Additionally, the high curvatures at endocytic sites means that a higher imaging  
392 resolution is required. Live-cell light microscopy is limited in resolution (even in superresolution  
393 methods (Waldchen et al., 2015; Sydor et al., 2015)), and traditional electron microscopy following  
394 chemical fixation may not fully preserve the shape of the bilayer (Bozzola and Russell, 1999; Stephens  
395 and Allan, 2003). To this end, cryo-electron tomography may provide the best preservation, but it  
396 suffers from anisotropic resolution as a result of the “missing wedge” effect (Lučić et al., 2013).  
397 As a result, error can be introduced into the fundamental position and geometric variables of the  
398 constitutive equations associated with the membrane deformation. Errors in the position and shape  
399 coordinates, coupled with non-axisymmetric geometries can result in non-linear error propagation in  
400 the calculations and their effects are not yet understood.

## 401 Discussion

402 In this study, we presented a framework for the calculation of axial and radial tractions for non-linear  
403 deformations of the membrane in the absence and in the presence of heterogeneities, solely based  
404 on the membrane geometry and material properties. From these calculations, we summarize that (a)  
405 tether formation requires both axial and radial tractions (Fig. 3) and (b) line tension can be calculated  
406 between two phases as an energy per unit length (Fig. 6). Importantly, using different examples of  
407 critical membrane shapes that occur in endocytosis and exocytosis, we have demonstrated that the  
408 local tractions are directly related to deviations from idealized geometries and can be generated by  
409 membrane heterogeneity. Moving forward, this procedure can be useful for the analysis of forces  
410 acting on membranes, both in reconstituted systems and in cells.

411 Using the analysis presented here and having some knowledge of the shape and material properties  
412 will allow us to estimate the local stresses acting on the membrane. It is important to note that the  
413 tractions calculated here depend on the knowledge of the membrane strain energy and the material  
414 properties.

415 It has been demonstrated that PEGylation of lipids (Lee and Pastor, 2011), amphiphilic block  
416 copolymers (Lim et al., 2017), and protein crowding (Snead et al., 2017) can curve and even induce  
417 scission of artificial lipid bilayers. Additional energy terms such as adhesion energy, entropic contri-  
418 butions from proteins, protein crowding, tilt, and cytoskeletal interactions will alter the expressions  
419 for tractions and introduce more material properties (Rangamani et al., 2014a; Snead et al., 2017;  
420 Carlsson, 2018). We also demonstrate that the knowledge of the underlying biophysical mechanism  
421 becomes important because the shape of the membrane, particularly in cells, is a many-to-one function  
422 (multiple processes can give rise to a similar shape). However, the fundamental principle that shape  
423 contains information about the underlying forces will apply regardless of the exact form of the energy  
424 used to perform the analysis.

425 There can be multiple sources of error in the quantification of forces – error in the measurement  
426 of material properties, errors in the measurement of the shape itself due to imaging, and finally error  
427 in the assumptions about stress-strain relationships themselves. While many of the measurements of  
428 material properties are conducted *in vitro*, recently, some studies have begun to measure the *in vivo*  
429 structure of lipids and their material properties (Nickels et al., 2017). Interestingly, recent works also  
430 suggest that there is no long range propagation of membrane tension in cells, seemingly reducing the

431 uncertainty in calculating tension (Shi et al., 2018). Additionally, efforts will need to focus on the  
432 development of image analysis methods to extract the shape of the membrane while reducing noise.  
433 There are already quite a few efforts in this direction, although these are focused on tension-based  
434 mechanisms in epithelial sheets. Curvature-dependent effects are harder to discern from imaging data  
435 (Brodland et al., 2014; Veldhuis et al., 2015). There is also a need for the development of algorithms  
436 that do not *a priori* assume symmetry of the shape and can handle irregular geometries. Then, imaging  
437 data, which are abundant in the literature (Frost et al., 2009; Dannhauser and Ungewickell, 2012;  
438 Snead et al., 2017), can potentially be analyzed and used to populate a database/machine-learning  
439 framework. This can then be extended to analyze the shapes of complex structures in cells, which  
440 likely include contributions from multiple mechanisms. Finally, an assumption that we have made in  
441 this study is to neglect the surrounding fluid flow or inertial dynamics and assume that the membrane  
442 is at mechanical equilibrium at all times (Steigmann et al., 2003; Naghdi, 1973; Deserno, 2015).  
443 This assumption is commonly used in the modeling of membrane curvature to keep the mathematics  
444 tractable (Steigmann, 1999; Deserno, 2015). While the Helfrich model has been used by us and others  
445 with great success, the role of these dynamics of deformations, thermal fluctuations (Monzel and  
446 Sengupta, 2016; Steinkühler et al., 2018), and multiscale models will be needed to truly appreciate  
447 different spatial and temporal scales of forces. As a small step in this direction, we have implemented a  
448 modified form of the Helfrich energy including deviatoric effects to consider the anisotropic nature of  
449 spontaneous curvature (Fig. S10). While our current focus has been on explaining the mathematical  
450 and physical basis of local tractions and how these tractions can be used to understand important  
451 experimental systems and biological processes, to close the gap between modeling and experiments,  
452 future efforts will need to focus on relaxing the assumption of rotational symmetry and the ability to  
453 estimate local tractions in experimentally observed membrane shapes.

454 **Acknowledgments** This work was supported by ARO W911NF-16-1-0411, AFOSR FA9550-15-  
455 1-0124, and NSF PHY-1505017 grants to P.R. J.C.S. was supported by NIH R01GM112065. R.V. was  
456 supported by the UCSD Frontiers of Innovation Scholars Program (FISP) G3020. H.A. was supported  
457 by a fellowship from the Virtual Molecular Cell Consortium (VMCC), a program between UCSD and  
458 the Scripps Research Institute. J.E.H. was supported by the Department of Defense (DoD) through  
459 the National Defense Science & Engineering Graduate Fellowship (NDSEG) Program. The authors  
460 would also like to thank Prof. George Oster and Prof. David Steigmann for initial discussions and  
461 Drs. Morgan Chabanon and Matthew S. Akamatsu for their suggestions on improving the manuscript.

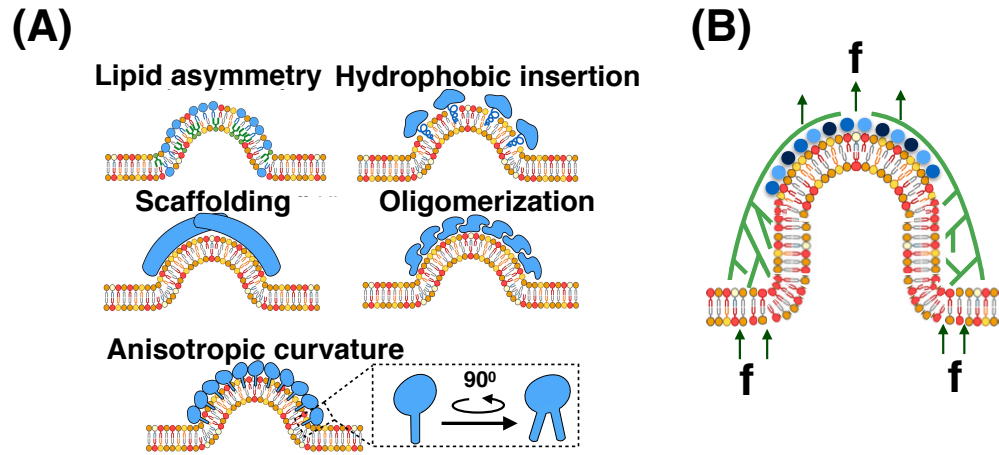

Figure 1: Curvature generation in biological membranes (Chabanon et al., 2017). Membrane curvature is controlled by different physical inputs including (A) protein-induced spontaneous curvature and (B) forces exerted by the cytoskeleton.

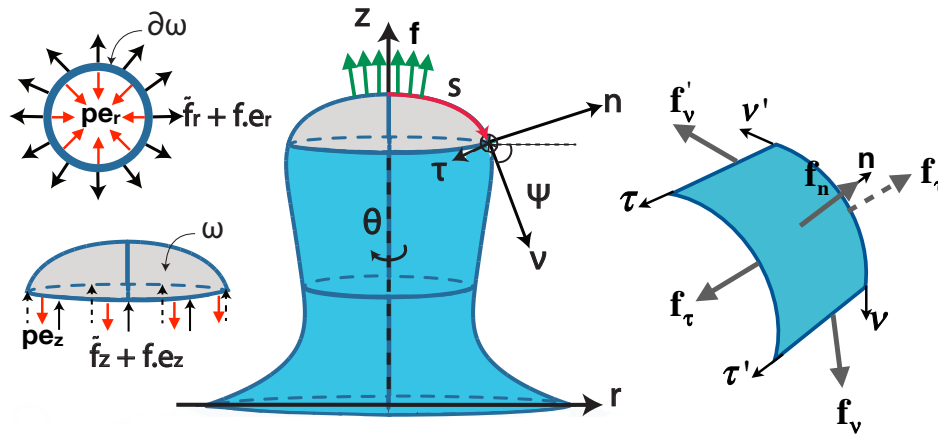

Figure 2: A schematic representing the axisymmetric coordinate system used for calculating curvature and traction. Inset shows that pressure opposes traction and external force in both the radial and axial directions.

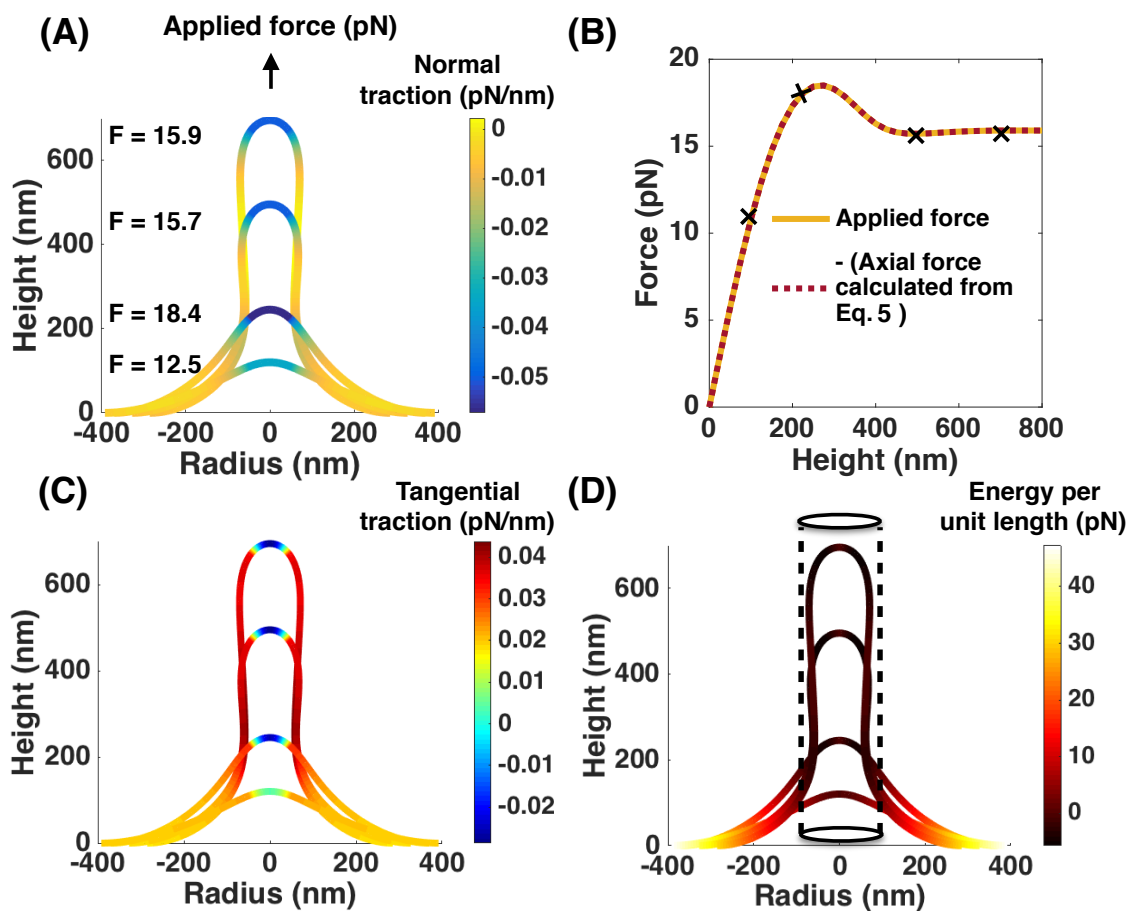

Figure 3: Analysis of normal and tangential traction for membrane tethers. (A) Normal traction distribution along four membrane tether shapes obtained by applying a point load of the specified magnitude at the pole,  $\lambda_0 = 0.02$  pN/nm,  $\kappa = 320$  pN · nm. (B) Magnitude of axial force as a function of tether height, showing an exact match between the force (Eq. 5) calculated from the traction distribution and obtained directly from the simulation. (C) Tangential traction distribution along the membrane shapes for conditions shown in (A). (D) Energy per unit length calculated using Eq. 6 along the four membrane shapes shown in (A). The dashed lines outline the equilibrium geometry for a membrane cylinder,  $R_{\text{cylinder}} = \frac{1}{2} \sqrt{\frac{\kappa}{\lambda_0}}$ .

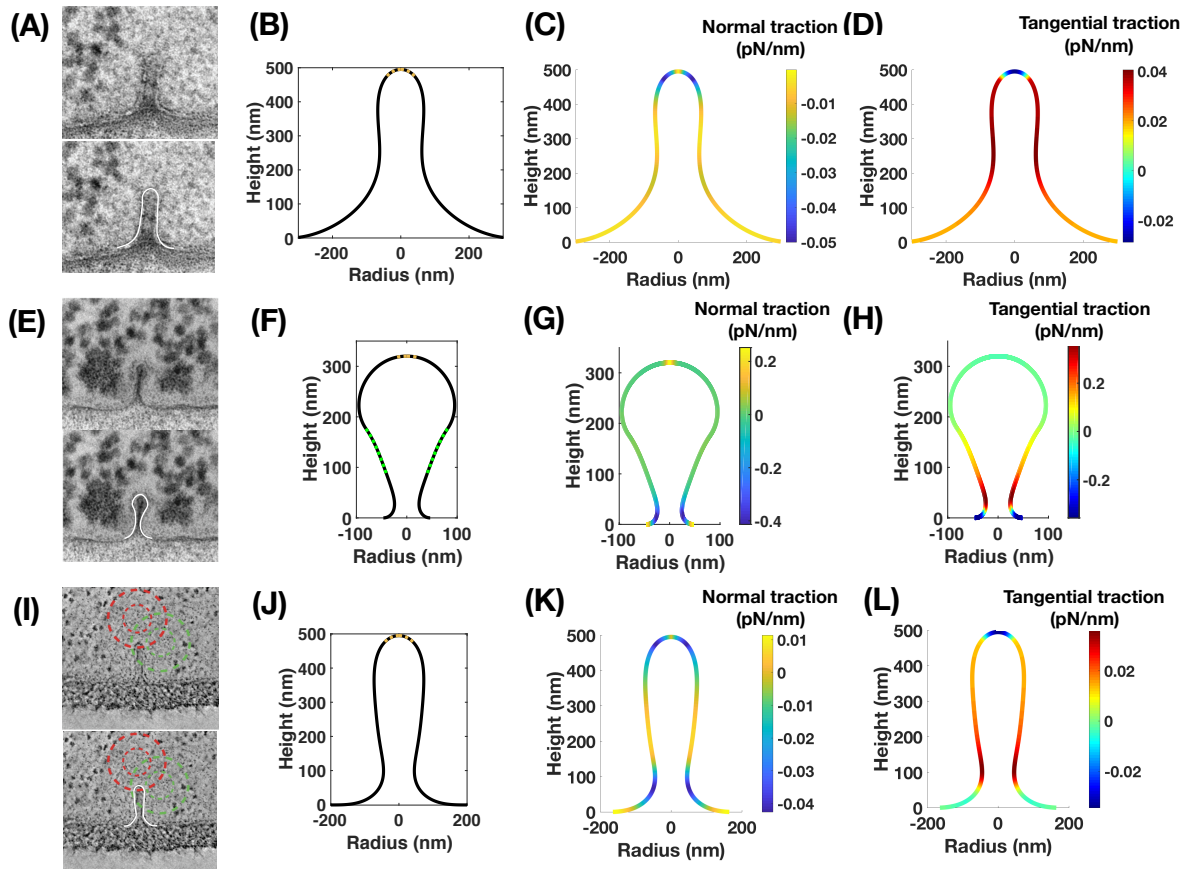

Figure 4: Comparison of normal and tangential tractions between multiple mechanisms of membrane tether formation.

(4 continued...)



---

(...4 continuation))

Figure 4 (cont.): (A) EM image of an endocytic PM invagination in a *bzz1Δrvs167Δ* yeast cell (Kishimoto et al., 2011). *Top inset* – Original EM image, *Bottom inset* – EM image with traced membrane shape (white). (B) Simulation membrane shape obtained by application of a point force (brown),  $\lambda_0 = 0.02$  pN/nm,  $\kappa = 320$  pN · nm. (C) Normal traction distribution along the membrane shape in (B). (D) Tangential traction distribution along the membrane shape in (B). (E) EM image of an endocytic PM invagination in a wild type (WT) yeast cell (Kishimoto et al., 2011). *Top inset* – Original EM image, *Bottom inset* – EM image with traced membrane shape (white). (F) Simulation membrane shape obtained by application of an anisotropic spontaneous curvature (green) along the tubular section of a membrane tether,  $\lambda_0 = 0.02$  pN/nm,  $\kappa = 320$  pN · nm,  $C = -0.01$  nm<sup>-1</sup>,  $D = 0.01$  nm<sup>-1</sup>. (G) Normal traction distribution along the membrane shape in (F). (H) Tangential traction distribution along the membrane shape in (F). (I) ET (electron tomography) image of an endocytic invagination in budding yeast (Kukulski et al., 2012). *Top inset* – Original EM image, *Bottom inset* – EM image with traced membrane shape (white). (J) Simulation membrane shape obtained by application of a point force (brown) against an equivalent pressure to the membrane tension in (B),  $\lambda_0 = 0$  pN/nm,  $\kappa = 320$  pN · nm,  $p = 0.3$  kPa. (K) Normal traction distribution along the membrane shape in (J). (L) Tangential traction distribution along the membrane shape in (J).

---

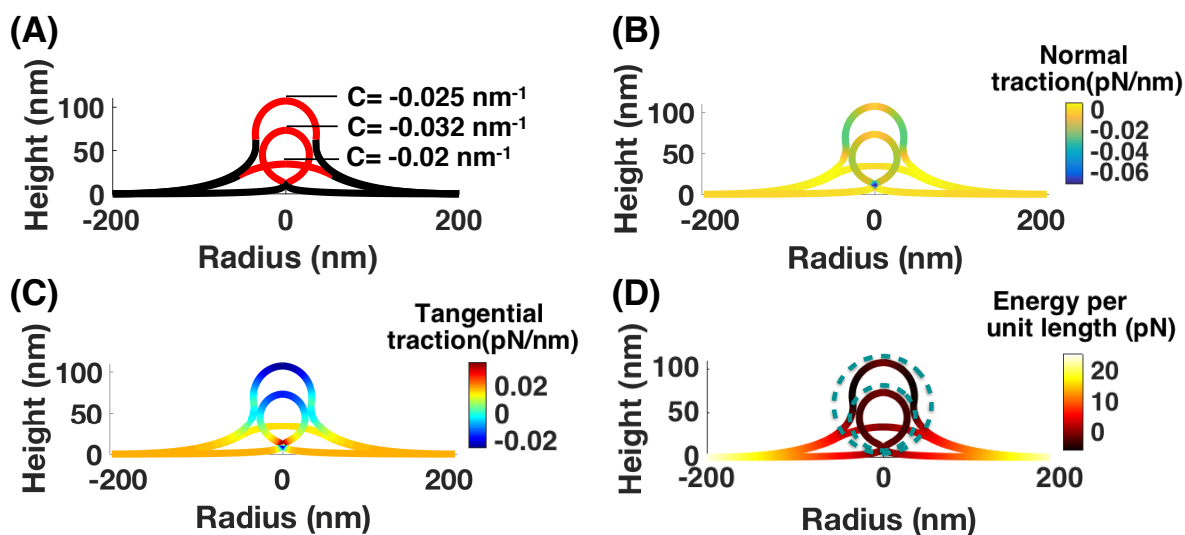

Figure 5: Analysis of budding due to protein-induced spontaneous curvature and calculation of line tension. Simulations were conducted with ( $A = 10,053 \text{ nm}^2$ ) spontaneous curvature at the center of an initially flat patch increasing from  $C = 0$  to  $C = 0.032 \text{ nm}^{-1}$ ,  $\lambda_0 = 0.02 \text{ pN/nm}$ ,  $\kappa = 320 \text{ pN} \cdot \text{nm}$ ,  $p = 0 \text{ pN/nm}^2$  (Hassinger et al., 2017). (A) Membrane shapes for three different spontaneous curvature distributions with the value of  $C$  indicated in the red region and zero in the black region. (B) Normal traction along the membrane for the shapes shown in (A). (C) Tangential traction distribution along the shapes shown in (A); (D) Energy per unit length distribution for the three different shapes. The dashed line circles outline spheres with mean curvatures  $H = 0.032 \text{ nm}^{-1}$  (smaller circle) and  $H = 0.025 \text{ nm}^{-1}$  (larger circle).

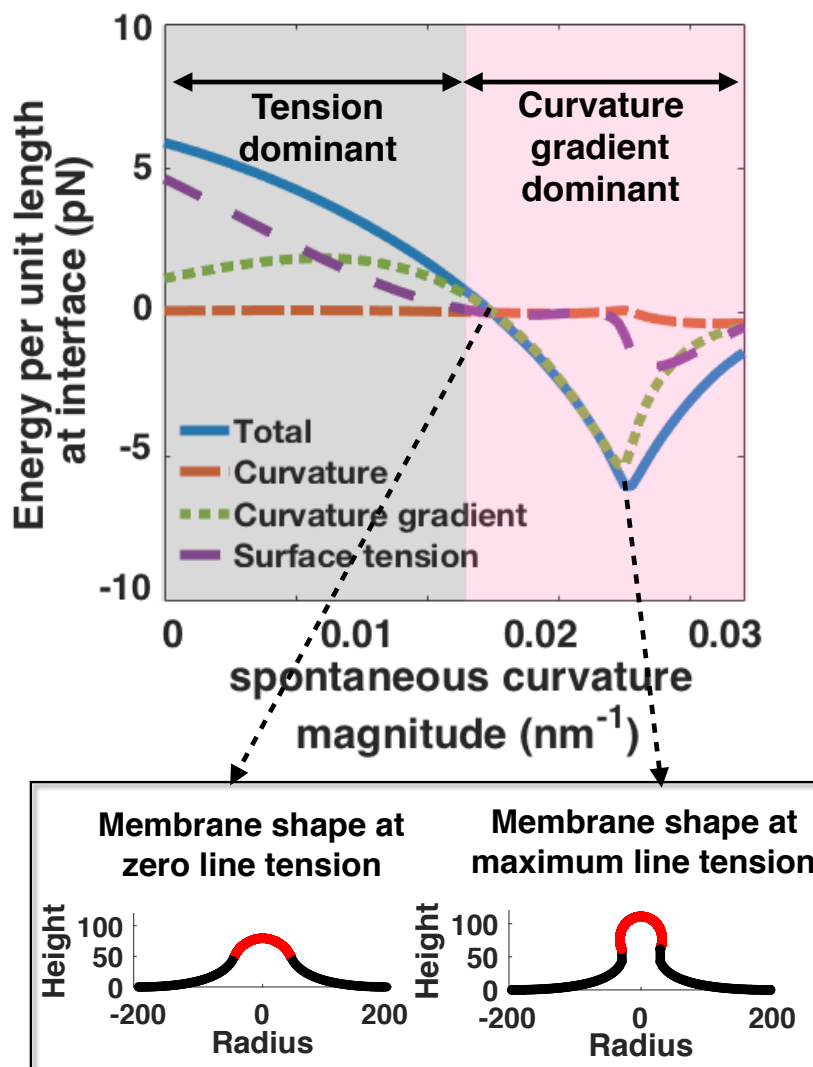

Figure 6: Change in energy per unit length and its components at the interface with increasing spontaneous curvature. Two regimes are observed: a surface tension-dominated regime for small values of spontaneous curvature and a curvature gradient-dominated regime for large values of spontaneous curvature. The membrane configurations are shown for two spontaneous curvature  $C = -0.02 \text{ nm}^{-1}$ , where energy per unit length at interface is zero and  $C = -0.025 \text{ nm}^{-1}$ , where energy per unit length is maximum. The red domains show the region of spontaneous curvature for the corresponding shapes.

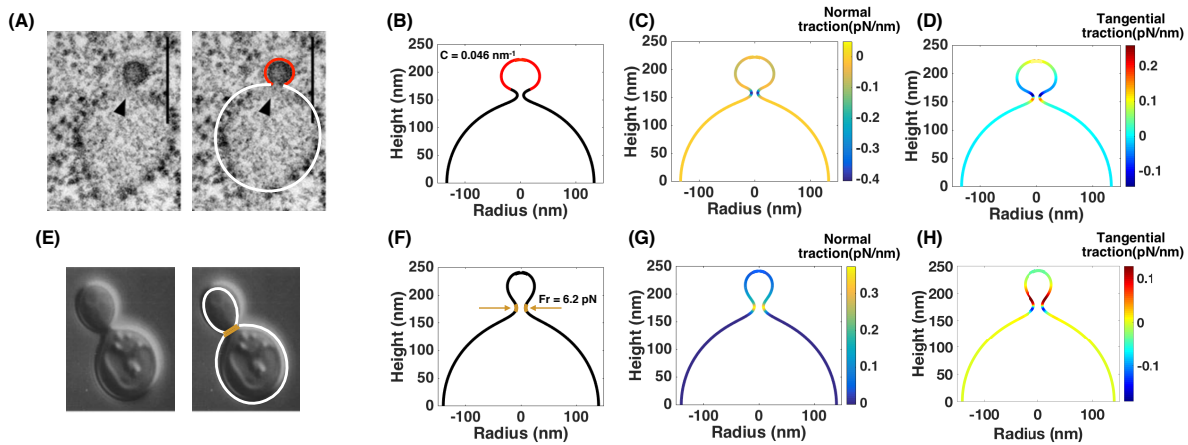

Figure 7: Comparison of normal and tangential tractions between two different mechanisms of membrane budding. (A) EM image of COPII budding from the endoplasmic reticulum (ER) in green algae (Robinson et al., 2015). *Left inset* – Original EM image, *Right inset* – EM image with traced membrane shape. Red - COPII coat, white - bare membrane (B) Simulation of bud formation on a hemispherical cap using a constant spontaneous curvature ( $C = -0.046 \text{ nm}^{-1}$ , red) (C) Normal traction distribution along the membrane shape in (B). A large negative normal traction can be seen at the neck of the formed vesicle. (D) Tangential traction distribution along the membrane shape in (B). There is a change in the sign of the tangential traction before and after the bud neck. (E) Brightfield microscopy image of a budding yeast (Mozdy et al., 2000). *Left inset* – Original EM image, *Right inset* – EM image with traced membrane shape. brown - contractile ring at the bud neck. (F) Simulation of bud formation on a hemispherical cap with a constant radial force ( $F_r = 6.2 \text{ pN}$ , yellow) that locally constricts the hemisphere to form a bud. (G) Normal traction distribution along the membrane shape in (F). There is a positive normal traction at the vesicle neck in response to the applied force. (H) Tangential traction distribution along the membrane shape in (F).

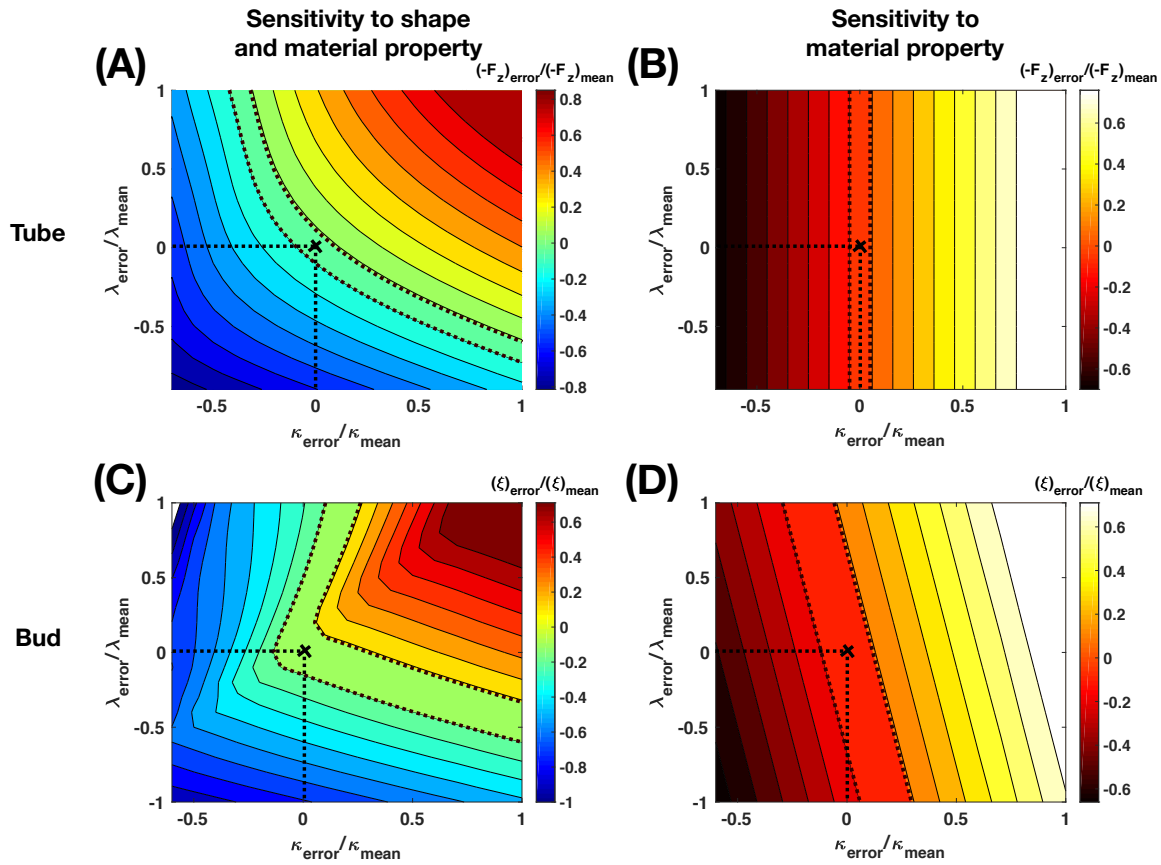

Figure 8: Parametric sensitivity analysis to material properties. Axial force (Eq. 5) and energy per unit length (Eq. 6) were calculated for a variation in the bending rigidity  $\kappa$  and membrane tension  $\lambda_0$  both in membrane tubes (A-B) and buds (C-D). Dashed lines indicate 10 % error.  $\lambda_{\text{mean}} = 0.02 \text{ pN/nm}$ ,  $\kappa_{\text{mean}} = 320 \text{ pN} \cdot \text{nm}$ ,  $-(F_z)_{\text{mean}} = 18.0167 \text{ pN}$  (corresponding to a tube of height 300 nm in Fig. 3),  $\xi_{\text{mean}} = 6.13 \text{ pN}$  (corresponding to a spontaneous curvature of  $0.0276 \text{ nm}^{-1}$  in Fig. 5). The sensitivity analysis was performed in two ways – (i). Sensitivity to shape and material property by running multiple simulations corresponding to the different parameter values (A, C) followed by an error calculation with respect to the mean value, (ii). Sensitivity to only material property by using a range of parameter values during calculation of axial force (Eq. 5) and energy per unit length (Eq. 6) for a single simulation (mean). (A) Sensitivity to shape and material property in a membrane tube. (B) Sensitivity to only material property in a membrane tube. (C) Sensitivity to shape and material property in a membrane bud. (D) Sensitivity to only material property in a membrane bud.

## 462 **References**

- 463 S. Aghamohammadzadeh and K. R. Ayscough. Differential requirements for actin during yeast and  
464 mammalian endocytosis. *Nature cell biology*, 11(8):1039, 2009.
- 465 A. Agrawal and D. J. Steigmann. Boundary-value problems in the theory of lipid membranes. *Con-*  
466 *tinuum Mechanics and Thermodynamics*, 21(1):57–82, 2009a.
- 467 A. Agrawal and D. J. Steigmann. Modeling protein-mediated morphology in biomembranes. *Biome-*  
468 *chanics and modeling in mechanobiology*, 8(5):371–379, 2009b.
- 469 S. Aimon, A. Callan-Jones, A. Berthaud, M. Pinot, G. E. Toombes, and P. Bassereau. Membrane  
470 shape modulates transmembrane protein distribution. *Developmental cell*, 28(2):212–218, 2014.
- 471 P. Bassereau, B. Sorre, and A. Lévy. Bending lipid membranes: Experiments after w. Helfrich’s model.  
472 *Advances in colloid and interface science*, 208:47–57, 2014.
- 473 R. Basu, E. L. Munteanu, and F. Chang. Role of turgor pressure in endocytosis in fission yeast.  
474 *Molecular biology of the cell*, 25(5):679–687, 2014.
- 475 T. Baumgart, S. T. Hess, and W. W. Webb. Imaging coexisting fluid domains in biomembrane models  
476 coupling curvature and line tension. *Nature*, 425(6960):821–824, 2003.
- 477 T. Baumgart, S. Das, W. Webb, and J. Jenkins. Membrane elasticity in giant vesicles with fluid phase  
478 coexistence. *Biophysical journal*, 89(2):1067–1080, 2005.
- 479 J. J. Bozzola and L. D. Russell. *Electron microscopy: principles and techniques for biologists*. Jones  
480 & Bartlett Learning, 1999.
- 481 G. W. Brodland, J. H. Veldhuis, S. Kim, M. Perrone, D. Mashburn, and M. S. Hutson. Cellfit: a  
482 cellular force-inference toolkit using curvilinear cell boundaries. *PloS one*, 9(6):e99116, 2014.
- 483 J. Buehrle, S. Herminghaus, and F. Mugele. Impact of line tension on the equilibrium shape of liquid  
484 droplets on patterned substrates. *Langmuir*, 18(25):9771–9777, 2002.
- 485 D. J. Busch, J. R. Houser, C. C. Hayden, M. B. Sherman, E. M. Lafer, and J. C. Stachowiak. Intrinsi-  
486 cally disordered proteins drive membrane curvature. *Nature communications*, 6:7875, 2015.

- 487 C. Buser and D. G. Drubin. Ultrastructural imaging of endocytic sites in *saccharomyces cerevisiae*  
488 by transmission electron microscopy and immunolabeling. *Microscopy and Microanalysis*, 19(02):  
489 381–392, 2013.
- 490 R. Capovilla and J. Guven. Geometry of lipid vesicle adhesion. *Physical Review E*, 66(4):041604,  
491 2002a.
- 492 R. Capovilla and J. Guven. Stresses in lipid membranes. *Journal of Physics A: Mathematical and*  
493 *General*, 35(30):6233, 2002b.
- 494 R. Capovilla and J. Guven. Stress and geometry of lipid vesicles. *Journal of Physics: Condensed*  
495 *Matter*, 16(22):S2187, 2004.
- 496 A. E. Carlsson. Membrane bending by actin polymerization. *Current opinion in cell biology*, 50:1–7,  
497 2018.
- 498 M. Chabanon and P. Rangamani. Gaussian curvature directs the distribution of spontaneous curvature  
499 on bilayer membrane necks. *Soft matter*, 14(12):2281–2294, 2018.
- 500 M. Chabanon, J. C. Stachowiak, and P. Rangamani. Systems biology of cellular membranes: a con-  
501 vergence with biophysics. *Wiley Interdisciplinary Reviews: Systems Biology and Medicine*, 9(5),  
502 2017.
- 503 N. Dan and S. Safran. Effect of lipid characteristics on the structure of transmembrane proteins.  
504 *Biophysical Journal*, 75(3):1410–1414, 1998.
- 505 P. N. Dannhauser and E. J. Ungewickell. Reconstitution of clathrin-coated bud and vesicle formation  
506 with minimal components. *Nature Cell Biology*, 14(6):634–639, 2012.
- 507 I. Derényi, F. Jülicher, and J. Prost. Formation and interaction of membrane tubes. *Physical review*  
508 *letters*, 88(23):238101, 2002.
- 509 J. Derganc and A. Čopič. Membrane bending by protein crowding is affected by protein lateral con-  
510 finement. *Biochimica et Biophysica Acta (BBA)-Biomembranes*, 1858(6):1152–1159, 2016.
- 511 M. Deserno. Fluid lipid membranes: From differential geometry to curvature stresses. *Chemistry and*  
512 *physics of lipids*, 185:11–45, 2015.

- 513 S. Dmitrieff and F. Nédélec. Membrane mechanics of endocytosis in cells with turgor. *PLoS compu-*  
514 *tational biology*, 11(10):e1004538, 2015.
- 515 D. Einstein, P. Reinhall, M. Nicosia, R. Cochran, and K. Kunzelman. Dynamic finite element im-  
516 plementation of nonlinear, anisotropic hyperelastic biological membranes. *Computer Methods in*  
517 *Biomechanics & Biomedical Engineering*, 6(1):33–44, 2003.
- 518 K. Farsad and P. De Camilli. Mechanisms of membrane deformation. *Current opinion in cell biology*,  
519 15(4):372–381, 2003.
- 520 M. G. Ford, I. G. Mills, B. J. Peter, Y. Vallis, G. J. Praefcke, P. R. Evans, and H. T. McMahon.  
521 Curvature of clathrin-coated pits driven by epsin. *Nature*, 419(6905):361, 2002.
- 522 J.-B. Fournier. On the stress and torque tensors in fluid membranes. *Soft Matter*, 3(7):883–888, 2007.
- 523 A. Frost, V. M. Unger, and P. De Camilli. The bar domain superfamily: membrane-molding macro-  
524 molecules. *Cell*, 137(2):191–196, 2009.
- 525 Y.-c. Fung. *Biomechanics: mechanical properties of living tissues*. Springer Science & Business  
526 Media, 2013.
- 527 P. A. Giardini, D. A. Fletcher, and J. A. Theriot. Compression forces generated by actin comet tails  
528 on lipid vesicles. *Proceedings of the National Academy of Sciences*, 100(11):6493–6498, 2003.
- 529 J. Guven. Membrane geometry with auxiliary variables and quadratic constraints. *Journal of Physics*  
530 *A: Mathematical and General*, 37(28):L313, 2004.
- 531 J. E. Hassinger, G. Oster, D. G. Drubin, and P. Rangamani. Design principles for robust vesiculation in  
532 clathrin-mediated endocytosis. *Proceedings of the National Academy of Sciences*, 114(7):E1118–  
533 E1127, 2017.
- 534 V. Heinrich, B. Božič, S. Svetina, and B. Žekš. Vesicle deformation by an axial load: from elongated  
535 shapes to tethered vesicles. *Biophysical journal*, 76(4):2056–2071, 1999.
- 536 W. Helfrich. Elastic properties of lipid bilayers: theory and possible experiments. *Zeitschrift für*  
537 *Naturforschung C*, 28(11-12):693–703, 1973.
- 538 R. M. Hochmuth. Micropipette aspiration of living cells. *J. Biomech.*, 33(1):15–22, Jan. 2000.



- 539 G. A. Holzapfel, R. Eberlein, P. Wriggers, and H. W. Weizsäcker. Large strain analysis of soft biolog-  
540 ical membranes: Formulation and finite element analysis. *Computer methods in applied mechanics*  
541 *and engineering*, 132(1-2):45–61, 1996.
- 542 A. Iglič, H. Hägerstrand, P. Veranič, A. Plemenitaš, and V. Kralj-Iglič. Curvature-induced accumula-  
543 tion of anisotropic membrane components and raft formation in cylindrical membrane protrusions.  
544 *Journal of Theoretical Biology*, 240(3):368–373, 2006.
- 545 J. Jenkins. Static equilibrium configurations of a model red blood cell. *Journal of mathematical*  
546 *biology*, 4(2):149–169, 1977.
- 547 A. J. Jin, K. Prasad, P. D. Smith, E. M. Lafer, and R. Nossal. Measuring the elasticity of clathrin-coated  
548 vesicles via atomic force microscopy. *Biophysical journal*, 90(9):3333–3344, 2006.
- 549 L. Karotki, J. T. Huiskonen, C. J. Stefan, N. E. Ziólkowska, R. Roth, M. A. Surma, N. J. Krogan, S. D.  
550 Emr, J. Heuser, K. Grünewald, et al. Eisosome proteins assemble into a membrane scaffold. *J Cell*  
551 *Biol*, 195(5):889–902, 2011a.
- 552 L. Karotki, J. T. Huiskonen, C. J. Stefanand, N. E. Ziólkowska, R. Roth, M. A. Surma, N. J. Kro-  
553 gan, S. D. Emr, J. Heuser, K. Grünewald, and T. C. Walther. Eisosome proteins assemble into a  
554 membrane scaffold. *J. Cell Biol.*, 195(5):889–902, 2011b.
- 555 T. Kirchhausen. Bending membranes. *Nature cell biology*, 14(9):906, 2012.
- 556 T. Kishimoto, Y. Sun, C. Buser, J. Liu, A. Michelot, and D. G. Drubin. Determinants of endocytic  
557 membrane geometry, stability, and scission. *Proceedings of the National Academy of Sciences*, 108  
558 (44):E979–E988, 2011.
- 559 M. M. Kozlov, F. Campelo, N. Liska, L. V. Chernomordik, S. J. Marrink, and H. T. McMahon. Mech-  
560 anisms shaping cell membranes. *Current opinion in cell biology*, 29:53–60, 2014.
- 561 W. Kukulski, M. Schorb, M. Kaksonen, and J. A. Briggs. Plasma membrane reshaping during endo-  
562 cytosis is revealed by time-resolved electron tomography. *Cell*, 150(3):508–520, 2012.
- 563 P. I. Kuzmin, S. A. Akimov, Y. A. Chizmadzhev, J. Zimmerberg, and F. S. Cohen. Line tension and  
564 interaction energies of membrane rafts calculated from lipid splay and tilt. *Biophysical journal*, 88  
565 (2):1120–1133, 2005.

- 566 H. Lee and R. W. Pastor. Coarse-grained model for pegylated lipids: effect of pegylation on the size  
567 and shape of self-assembled structures. *The Journal of Physical Chemistry B*, 115(24):7830–7837,  
568 2011.
- 569 H. J. Lee, E. L. Peterson, R. Phillips, W. S. Klug, and P. A. Wiggins. Membrane shape as a reporter  
570 for applied forces. *Proceedings of the National Academy of Sciences*, 105(49):19253–19257, 2008.
- 571 L. M. Lee and A. P. Liu. The application of micropipette aspiration in molecular mechanics of single  
572 cells. *J. Nanotechnol. Eng. Med.*, 5(4):0408011–0408016, Nov. 2014.
- 573 M. C. Lee, L. Orci, S. Hamamoto, E. Futai, M. Ravazzola, and R. Schekman. Sar1p n-terminal helix  
574 initiates membrane curvature and completes the fission of a copii vesicle. *Cell*, 122(4):605–617,  
575 2005.
- 576 S. K. Lim, A. S. Wong, H.-P. M. de Hoog, P. Rangamani, A. N. Parikh, M. Nallani, S. Sandin, and  
577 B. Liedberg. Spontaneous formation of nanometer scale tubular vesicles in aqueous mixtures of  
578 lipid and block copolymer amphiphiles. *Soft Matter*, 2017.
- 579 D. Lingwood and K. Simons. Lipid rafts as a membrane-organizing principle. *science*, 327(5961):  
580 46–50, 2010.
- 581 R. Lipowsky. Budding of membranes induced by intramembrane domains. *Journal de Physique II*, 2  
582 (10):1825–1840, 1992.
- 583 R. Lipowsky. Bending of membranes by anchored polymers. *EPL (Europhysics Letters)*, 30(4):197,  
584 1995.
- 585 R. Lipowsky. Spontaneous tubulation of membranes and vesicles reveals membrane tension generated  
586 by spontaneous curvature. *Faraday Discuss.*, 161:305–331, 2013.
- 587 J. Liu, M. Kaksonen, D. G. Drubin, and G. Oster. Endocytic vesicle scission by lipid phase boundary  
588 forces. *Proceedings of the National Academy of Sciences*, 103(27):10277–10282, 2006.
- 589 M. Lokar, D. Kabaso, N. Resnik, K. Sepčić, V. Kralj-Iglič, P. Veranič, R. Zorec, and A. Iglič. The role  
590 of cholesterol-sphingomyelin membrane nanodomains in the stability of intercellular membrane  
591 nanotubes. *International journal of nanomedicine*, 7:1891, 2012.

- 592 V. Lučić, A. Rigort, and W. Baumeister. Cryo-electron tomography: the challenge of doing structural  
593 biology in situ. *J Cell Biol*, 202(3):407–419, 2013.
- 594 P. K. Mattila and P. Lappalainen. Filopodia: molecular architecture and cellular functions. *Nature*  
595 *reviews Molecular cell biology*, 9(6):446–454, 2008.
- 596 Z. A. McDargh, P. Vázquez-Montejo, J. Guven, and M. Deserno. Constriction by dynamin: Elasticity  
597 versus adhesion. *Biophysical journal*, 111(11):2470–2480, 2016.
- 598 H. T. McMahon and J. L. Gallop. Membrane curvature and mechanisms of dynamic cell membrane  
599 remodelling. *Nature*, 438(7068):590, 2005.
- 600 M. R. Mofrad and R. D. Kamm. Cellular mechanotransduction, 2010.
- 601 C. Monzel and K. Sengupta. Measuring shape fluctuations in biological membranes. *Journal of*  
602 *Physics D: Applied Physics*, 49(24):243002, 2016.
- 603 A. Mozdy, J. McCaffery, and J. Shaw. Dnm1p gtpase-mediated mitochondrial fission is a multi-step  
604 process requiring the novel integral membrane component fis1p. *The Journal of cell biology*, 151  
605 (2):367–380, 2000.
- 606 S. Mukherjee and F. R. Maxfield. Role of membrane organization and membrane domains in endocytic  
607 lipid trafficking. *Traffic*, 1(3):203–211, 2000.
- 608 P. M. Naghdi. The theory of shells and plates. In *Linear Theories of Elasticity and Thermoelasticity*,  
609 pages 425–640. Springer, 1973.
- 610 S. R. Neves, P. Tsokas, A. Sarkar, E. A. Grace, P. Rangamani, S. M. Taubenfeld, C. M. Alberini, J. C.  
611 Schaff, R. D. Blitzer, I. I. Moraru, et al. Cell shape and negative links in regulatory motifs together  
612 control spatial information flow in signaling networks. *Cell*, 133(4):666–680, 2008.
- 613 J. D. Nickels, S. Chatterjee, C. B. Stanley, S. Qian, X. Cheng, D. A. Myles, R. F. Standaert, J. G.  
614 Elkins, and J. Katsaras. The in vivo structure of biological membranes and evidence for lipid  
615 domains. *PLoS biology*, 15(5):e2002214, 2017.
- 616 R. Phillips, J. Kondev, J. Theriot, and H. Garcia. *Physical biology of the cell*. Garland Science, 2012.

- 617 A. Picco, M. Mund, J. Ries, F. Nedelec, and M. Kaksonen. Visualizing the functional architecture of  
618 the endocytic machinery. *Elife*, 4, 2015.
- 619 T. R. Powers, G. Huber, and R. E. Goldstein. Fluid-membrane tethers: minimal surfaces and elastic  
620 boundary layers. *Physical Review E*, 65(4):041901, 2002.
- 621 C. Prévost, F. Tsai, P. Bassereau, and M. Simunovic. Pulling membrane nanotubes from giant unil-  
622 amellar vesicles. *Journal of visualized experiments: JoVE*, (130), 2017.
- 623 P. Rangamani, A. Lipshtat, E. U. Azeloglu, R. C. Calizo, M. Hu, S. Ghassemi, J. Hone, S. Scarlata,  
624 S. R. Neves, and R. Iyengar. Decoding information in cell shape. *Cell*, 154(6):1356–1369, 2013.
- 625 P. Rangamani, A. Benjamini, A. Agrawal, B. Smit, D. J. Steigmann, and G. Oster. Small scale mem-  
626 brane mechanics. *Biomechanics and modeling in mechanobiology*, 13(4):697–711, 2014a.
- 627 P. Rangamani, K. K. Mandadap, and G. Oster. Protein-induced membrane curvature alters local mem-  
628 brane tension. *Biophysical journal*, 107(3):751–762, 2014b.
- 629 D. L. Richmond, E. M. Schmid, S. Martens, J. C. Stachowiak, N. Liska, and D. A. Fletcher. Forming  
630 giant vesicles with controlled membrane composition, asymmetry, and contents. *Proceedings of the*  
631 *National Academy of Sciences*, 108(23):9431–9436, 2011.
- 632 D. G. Robinson, F. Brandizzi, C. Hawes, and A. Nakano. Vesicles versus tubes: Is endoplasmic  
633 reticulum-golgi transport in plants fundamentally different from other eukaryotes? *Plant Physiol-*  
634 *ogy*, 168(2):393–406, 2015.
- 635 W. Römer, L. Berland, V. Chambon, K. Gaus, B. Windschiegl, D. Tenza, M. R. Aly, V. Fraisier, J.-C.  
636 Florent, D. Perrais, et al. Shiga toxin induces tubular membrane invaginations for its uptake into  
637 cells. *Nature*, 450(7170):670, 2007.
- 638 A. Roux, G. Cappello, J. Cartaud, J. Prost, B. Goud, and P. Bassereau. A minimal system allowing  
639 tubulation with molecular motors pulling on giant liposomes. *Proceedings of the National Academy*  
640 *of Sciences*, 99(8):5394–5399, 2002.
- 641 A. Roux, D. Cuvelier, P. Nassoy, J. Prost, P. Bassereau, and B. Goud. Role of curvature and phase  
642 transition in lipid sorting and fission of membrane tubules. *The EMBO journal*, 24(8):1537–1545,  
643 2005.

- 644 U. Seifert. Configurations of fluid membranes and vesicles. *Advances in physics*, 46(1):13–137, 1997.
- 645 S. Semrau and T. Schmidt. Membrane heterogeneity—from lipid domains to curvature effects. *Soft*  
646 *Matter*, 5(17):3174–3186, 2009.
- 647 P. Sens and J. Plastino. Membrane tension and cytoskeleton organization in cell motility. *Journal of*  
648 *Physics: Condensed Matter*, 27(27):273103, 2015.
- 649 Z. Shi, Z. T. Graber, T. Baumgart, H. A. Stone, and A. E. Cohen. Cell membranes resist flow. *bioRxiv*,  
650 page 290643, 2018.
- 651 M. Simunovic, J.-B. Manneville, H.-F. Renard, E. Evergren, K. Raghunathan, D. Bhatia, A. K. Ken-  
652 worthy, G. A. Voth, J. Prost, H. T. McMahon, et al. Friction mediates scission of tubular membranes  
653 scaffolded by bar proteins. *Cell*, 170(1):172–184, 2017.
- 654 A.-S. Smith, E. Sackmann, and U. Seifert. Pulling tethers from adhered vesicles. *Physical review*  
655 *letters*, 92(20):208101, 2004.
- 656 W. T. Snead, C. C. Hayden, A. K. Gadok, C. Zhao, E. M. Lafer, P. Rangamani, and J. C. Stachowiak.  
657 Membrane fission by protein crowding. *Proceedings of the National Academy of Sciences*, 114(16):  
658 E3258–E3267, 2017.
- 659 J. C. Stachowiak, E. M. Schmid, C. J. Ryan, H. S. Ann, D. Y. Sasaki, M. B. Sherman, P. L. Geissler,  
660 D. A. Fletcher, and C. C. Hayden. Membrane bending by protein–protein crowding. *Nature cell*  
661 *biology*, 14(9):944–949, 2012.
- 662 D. Steigmann. Fluid films with curvature elasticity. *Archive for Rational Mechanics and Analysis*,  
663 150(2):127–152, 1999.
- 664 D. Steigmann, E. Baesu, R. E. Rudd, J. Belak, and M. McElfresh. On the variational theory of cell-  
665 membrane equilibria. *Interfaces and Free Boundaries*, 5(4):357–366, 2003.
- 666 J. Steinkühler, B. Różycki, C. Alvey, R. Lipowsky, T. R. Weikl, R. Dimova, and D. E. Discher.  
667 Membrane fluctuations and acidosis regulate cooperative binding of “marker of self” cd47 with  
668 macrophage checkpoint receptor sirp $\alpha$ . *J Cell Sci*, pages jcs–216770, 2018.
- 669 D. J. Stephens and V. J. Allan. Light microscopy techniques for live cell imaging. *Science*, 300(5616):  
670 82–86, 2003.

- 671 A. M. Sydor, K. J. Czymmek, E. M. Puchner, and V. Mennella. Super-resolution microscopy: from  
672 single molecules to supramolecular assemblies. *Trends in cell biology*, 25(12):730–748, 2015.
- 673 A. Tian, C. Johnson, W. Wang, and T. Baumgart. Line tension at fluid membrane domain boundaries  
674 measured by micropipette aspiration. *Physical review letters*, 98(20):208102, 2007.
- 675 I. Todhunter. *A History of the Theory of Elasticity and of the Strength of Materials: Galilei to Saint-*  
676 *Venant, 1639-1850.-v. 2. pt. 1-2. Saint-Venant to Lord Kelvin*, volume 1. University Press, 1886.
- 677 A. Varma, M. Morbidelli, and H. Wu. *Parametric sensitivity in chemical systems*. Cambridge Univer-  
678 sity Press, 2005.
- 679 J. H. Veldhuis, D. Mashburn, M. S. Hutson, and G. W. Brodland. Practical aspects of the cellular force  
680 inference toolkit (cellfit). In *Methods in cell biology*, volume 125, pages 331–351. Elsevier, 2015.
- 681 N. Walani, J. Torres, and A. Agrawal. Endocytic proteins drive vesicle growth via instability in high  
682 membrane tension environment. *Proceedings of the National Academy of Sciences*, 112(12):E1423–  
683 E1432, 2015.
- 684 S. Wäldchen, J. Lehmann, T. Klein, S. Van De Linde, and M. Sauer. Light-induced cell damage in  
685 live-cell super-resolution microscopy. *Scientific reports*, 5:15348, 2015.
- 686 R. E. Waugh. Surface viscosity measurements from large bilayer vesicle tether formation. ii. experi-  
687 ments. *Biophysical journal*, 38(1):29–37, 1982.
- 688 H. Zhao, A. Michelot, E. Koskela, V. Tkach, D. Stamou, D. Drubin, and P. Lappalainen. Membrane-  
689 Sculpting BAR Domains Generate Stable Lipid Microdomains. *Cell Rep*, 4:1213–1223, 2013.

# Supplementary material for “The role of traction in membrane curvature generation”

H. Alimohamadi\*<sup>1</sup>, R. Vasani\*<sup>1</sup>, J.E. Hassinger<sup>2</sup>, J.C. Stachowiak<sup>3</sup> and P. Rangamani\*<sup>1</sup>

<sup>1</sup>Department of Mechanical and Aerospace Engineering, University of California San Diego

<sup>2</sup>Biophysics Graduate Program, University of California Berkeley

<sup>3</sup>Department of Biomedical Engineering, University of Texas at Austin

June 10, 2018

## Contents

|          |                                                                                   |           |
|----------|-----------------------------------------------------------------------------------|-----------|
| <b>1</b> | <b>Table of notation</b>                                                          | <b>2</b>  |
| <b>2</b> | <b>Model development</b>                                                          | <b>3</b>  |
| 2.1      | Assumptions . . . . .                                                             | 3         |
| 2.2      | Equations of motion . . . . .                                                     | 4         |
| 2.2.1    | Helfrich energy for isotropic spontaneous curvature . . . . .                     | 5         |
| 2.2.2    | Helfrich energy for an anisotropic curvature . . . . .                            | 5         |
| 2.3      | Axisymmetric coordinates . . . . .                                                | 6         |
| 2.3.1    | Equations of motion for isotropic curvature . . . . .                             | 6         |
| 2.3.2    | Force balance along the membrane for isotropic spontaneous curvature . . . . .    | 8         |
| 2.3.3    | Equation of motion for anisotropic spontaneous curvatures . . . . .               | 10        |
| 2.3.4    | Force balance along the membrane for anisotropic spontaneous curvatures . . . . . | 10        |
| 2.4      | Asymptotic approximation for small radius . . . . .                               | 11        |
| <b>3</b> | <b>Additional tether and bud formation simulations</b>                            | <b>14</b> |
| 3.1      | Tubes pulled against pressure . . . . .                                           | 14        |
| 3.2      | Tubes pulled against pressure and surface tension . . . . .                       | 15        |
| 3.3      | Axial and radial tractions in bud formation . . . . .                             | 16        |
| 3.4      | Bud formation with a rigid protein coat . . . . .                                 | 16        |
| 3.5      | Bud and tube formation in arc length . . . . .                                    | 16        |
| 3.6      | Bud formation with cytoskeleton forces . . . . .                                  | 17        |
| 3.7      | Bud formation with anisotropic spontaneous curvature . . . . .                    | 17        |
| 3.8      | Additional sensitivity analysis . . . . .                                         | 17        |
| <b>4</b> | <b>Supplementary figures</b>                                                      | <b>18</b> |

---

\*prangamani@ucsd.edu

## 31 1 Table of notation

Table 1: Notation used in the model

| Notation               | Description                                                                | Units                       |
|------------------------|----------------------------------------------------------------------------|-----------------------------|
| $E$                    | Strain energy                                                              | $\text{pN} \cdot \text{nm}$ |
| $p$                    | Pressure difference across the membrane                                    | $\text{pN}/\text{nm}^2$     |
| $C$                    | Spontaneous curvature                                                      | $\text{nm}^{-1}$            |
| $\theta^\alpha$        | Parameters describing the surface                                          |                             |
| $W$                    | Local energy per unit area                                                 | $\text{pN}/\text{nm}$       |
| $\mathbf{r}$           | Position vector                                                            |                             |
| $\mathbf{n}$           | Normal to the membrane surface                                             | unit vector                 |
| $\boldsymbol{\nu}$     | Tangent to the membrane surface in direction of increasing arc length      | unit vector                 |
| $\boldsymbol{\tau}$    | Rightward normal in direction of revolution                                | unit vector                 |
| $\mathbf{a}_\alpha$    | Basis vectors describing the tangent plane                                 |                             |
| $\lambda$              | Membrane tension, $-(W + \gamma)$                                          | $\text{pN}/\text{nm}$       |
| $H$                    | Mean curvature of the membrane                                             | $\text{nm}^{-1}$            |
| $K$                    | Gaussian curvature of the membrane                                         | $\text{nm}^{-2}$            |
| $D$                    | Deviator curvature of the membrane                                         | $\text{nm}^{-2}$            |
| $\kappa$               | Bending modulus                                                            | $\text{pN} \cdot \text{nm}$ |
| $\kappa_G$             | Gaussian modulus                                                           | $\text{pN} \cdot \text{nm}$ |
| $s$                    | Arc length                                                                 | $\text{nm}$                 |
| $\theta$               | Azimuthal angle                                                            |                             |
| $\psi$                 | Angle between $\mathbf{e}_r$ and $\mathbf{a}_s$                            |                             |
| $r$                    | Radial distance                                                            | $\text{nm}$                 |
| $z$                    | Elevation from base plane                                                  | $\text{nm}$                 |
| $\mathbf{e}_r(\theta)$ | Radial basis vector                                                        | unit vector                 |
| $\mathbf{e}_\theta$    | Azimuthal basis vector                                                     | unit vector                 |
| $\mathbf{k}$           | Altitudinal basis vector                                                   | unit vector                 |
| $\mathbf{F}$           | External force                                                             | $\text{pN}$                 |
| $\mathbf{f}$           | Applied force per unit area                                                | $\text{pN}/\text{nm}^2$     |
| $\kappa_\tau$          | Transverse curvature                                                       | $\text{nm}^{-1}$            |
| $\kappa_\nu$           | Tangential curvature                                                       | $\text{nm}^{-1}$            |
| $\tau$                 | Surface twist                                                              | $\text{nm}^{-1}$            |
| $\tilde{\mathbf{f}}$   | Traction (force per unit length)                                           | $\text{pN}/\text{nm}$       |
| $\tilde{f}_r$          | Component of traction in radial direction                                  | $\text{pN}/\text{nm}$       |
| $\tilde{f}_z$          | Component of traction in axial direction                                   | $\text{pN}/\text{nm}$       |
| $\tilde{f}_n$          | Component of traction in normal direction                                  | $\text{pN}/\text{nm}$       |
| $\tilde{f}_\nu$        | Component of traction in transverse direction                              | $\text{pN}/\text{nm}$       |
| $\tilde{F}_z$          | Calculated force in axial direction                                        | $\text{pN}$                 |
| $\xi$                  | Energy per unit length                                                     | $\text{pN}$                 |
| $M$                    | Bending couple                                                             | $\text{pN} \cdot \text{nm}$ |
| $t$                    | Arc length around curve of revolution                                      | $\text{nm}$                 |
| $a$                    | Membrane area in mapped coordinate                                         | $\text{nm}^2$               |
| $A$                    | Membrane area in referenced frame                                          | $\text{nm}^2$               |
| $\boldsymbol{\gamma}$  | unit vector representing the one-dimensional orientation of a protein coat |                             |
| $\boldsymbol{\mu}$     | unit vector normal to $\boldsymbol{\gamma}$ and $\mathbf{n}$               |                             |
| $\kappa_{\text{coat}}$ | Bending modulus along protein coat                                         | $\text{pN} \cdot \text{nm}$ |
| $D_0$                  | Spontaneous membrane curvature deviator                                    | $\text{nm}^{-1}$            |



Table 2: Notation used in the model

| Notation                 | Description                                 | Units            |
|--------------------------|---------------------------------------------|------------------|
| $\kappa_{\text{mean}}$   | Mean value of bending modulus               | pN · nm          |
| $\kappa_{\text{error}}$  | Error in bending modulus                    | pN · nm          |
| $\lambda_{\text{mean}}$  | Mean value of membrane tension              | pN/nm            |
| $\lambda_{\text{error}}$ | Error in membrane tension                   | pN/nm            |
| $V$                      | Confined volume by membrane area            | nm <sup>3</sup>  |
| $s_{\text{max}}$         | Maximum arc length at the base              | nm               |
| $R_0$                    | Patch radius                                | nm               |
| $\kappa$                 | Bending rigidity of bare membrane           | pN · nm          |
| $\lambda_0$              | Surface tension at boundary                 | pN/nm            |
| $L$                      | Shape equation variable                     | nm <sup>-1</sup> |
| $x$                      | Dimensionless radial distance               |                  |
| $y$                      | Dimensionless height                        |                  |
| $h$                      | Dimensionless mean curvature                |                  |
| $c$                      | Dimensionless spontaneous curvature         |                  |
| $l$                      | Dimensionless L                             |                  |
| $\lambda^*$              | Dimensionless surface tension               |                  |
| $p^*$                    | Dimensionless pressure                      |                  |
| $f^*$                    | Dimensionless force per unit area           |                  |
| $\kappa^*$               | Dimensionless bending modulus               |                  |
| $\kappa_G^*$             | Dimensionless Gaussian modulus              |                  |
| $K^*$                    | Dimensionless Gaussian curvature            |                  |
| $\zeta$                  | Dimensionless area                          |                  |
| $A$                      | Area of spontaneous curvature field         | nm <sup>2</sup>  |
| $\zeta_{\text{force}}$   | Area of the applied force                   | nm <sup>2</sup>  |
| $\epsilon$               | Small parameter                             |                  |
| $X$                      | Rescaled parameter or dimensions for x      |                  |
| $Y$                      | Rescaled parameter or dimensions for y      |                  |
| $P$                      | Rescaled parameter or dimensions for $\psi$ |                  |

## 32 2 Model development

### 33 2.1 Assumptions

- 34 • Membrane curvature generated due to forces or protein-induced spontaneous curvature is much  
35 larger than the thickness of the bilayer. Based on this assumption, we model the lipid bilayer as  
36 a thin elastic shell with a bending energy given by the Helfrich-Canham energy, which is valid  
37 for radii of curvatures much larger than the thickness of the bilayer [1, 2].
- 38 • We neglect the surrounding fluid flow or inertial dynamics and assume that the membrane is in  
39 mechanical equilibrium at all times [3]. This assumption is commonly used in the modeling of  
40 membrane curvature to keep the mathematics tractable [4].
- 41 • The membrane is incompressible because the energetic cost of stretching the membrane is high

42 [5]. This constraint is implemented using a Lagrange multiplier [6, 7].

43 • Finally, for simplicity in the numerical simulations, we assume that the membrane in the region  
44 of interest is rotationally symmetric (Fig. 2).

## 45 2.2 Equations of motion

46 At equilibrium, the integration of local energy density ( $W$ ) over the total membrane surface area  $\omega$   
47 gives the strain energy of the system written as [8–10]

$$E = \int_{\omega} W(H, K, D; \theta^{\alpha}) da, \quad (S1)$$

48 where  $E$  is total strain energy,  $H$  is the mean curvature of the surface,  $K$  is the Gaussian curvature,  $D$   
49 is the curvature deviator, and  $\theta^{\alpha}$   $\{\alpha = 1, 2\}$  denotes the surface coordinate.

50 To impose the area incompressibility condition, we can rewrite the energy equation Eq. S1 using a  
51 Lagrange multiplier

$$E = \int_{\omega} [JW(H, K, D; \theta^{\alpha}) + \lambda(\theta^{\alpha})(J - 1)] dA, \quad (S2)$$

52 where  $\lambda$  is a Lagrange multiplier and

$$J = \sqrt{a/A}, \quad (S3)$$

53 is the local areal stretch due to mapping from a reference frame to the actual surface.

54 Minimization of the energy Eq. S2 by usage of the variational approach gives the governing shape  
55 equation and the incompressibility condition in a heterogeneous membrane

$$\begin{aligned} p + \mathbf{f} \cdot \mathbf{n} = \Delta \frac{1}{2} W_H + (W_K)_{;\alpha\beta} \tilde{b}^{\alpha\beta} + W_H(2H^2 - K) + 2H(KW_K - W) - 2\lambda H \\ + \frac{1}{2} [W_D(\gamma^{\alpha}\gamma^{\beta} - \mu^{\alpha}\mu^{\beta})]_{;\beta\alpha} + \frac{1}{2} W_D(\gamma^{\alpha}\gamma^{\beta} - \mu^{\alpha}\mu^{\beta}) b_{\alpha\xi} b_{\beta}^{\xi}, \end{aligned} \quad (S4)$$

56 and

$$\left( \frac{\partial W}{\partial x^{\alpha}} \Big|_{exp} + \lambda_{,\alpha} + W_D[b_{\alpha\beta}(\gamma^{\alpha}\gamma^{\beta});\eta] \right) a^{\beta\alpha} = \mathbf{f} \cdot \mathbf{a}_s. \quad (S5)$$

57 where  $\Delta(\cdot)$  is the surface Laplacian,  $p$  is the pressure difference across the membrane,  $\mathbf{f}$  is any ex-  
58 ternally applied force per unit area on the membrane,  $\mathbf{n}$  is the normal vector to the surface,  $\mathbf{a}_s$  is the  
59 tangent vector on surface,  $a^{\alpha\beta}$  is the dual metric,  $b_{\alpha\beta}$  are the coefficients of the second fundamental  
60 form,  $b_{\beta}^{\alpha}$  are the mixed components of the curvature,  $\tilde{b}^{\alpha\beta}$  is the co-factor of the curvature tensor, and  
61  $(\cdot)_{|exp}$  denotes the explicit derivative with respect to coordinate  $\theta^{\alpha}$ . Also,  $\gamma^{\alpha}$  and  $\mu^{\alpha}$  are the projections  
62 of  $\boldsymbol{\gamma}$  and  $\boldsymbol{\mu}$  along the tangential vectors with

$$\begin{aligned}\gamma^\alpha &= \boldsymbol{\gamma} \cdot \mathbf{a}^\alpha, \\ \mu^\alpha &= \boldsymbol{\mu} \cdot \mathbf{a}^\alpha\end{aligned}\tag{S6}$$

63 where  $\boldsymbol{\gamma}$  is a unit vector representing the orientation of a protein coat tangential to the one-dimensional  
64 curve on the surface, and  $\boldsymbol{\mu}$  is a unit vector defined by

$$\boldsymbol{\mu} = \mathbf{n} \times \boldsymbol{\gamma}\tag{S7}$$

65 In what follows, we explore different commonly used forms of energy as follows

66 (i). Helfrich energy for isotropic spontaneous curvature

67 (ii). Helfrich energy for anisotropic spontaneous curvature

### 68 2.2.1 Helfrich energy for isotropic spontaneous curvature

69 For a lipid bilayer membrane, we use a modified version of the Helfrich energy to account for the  
70 spatial variation of spontaneous curvature [7, 11, 12],

$$W = \kappa(\theta^\alpha)(H - C(\theta^\alpha))^2 + \kappa_G(\theta^\alpha)K,\tag{S8}$$

71  $C$  is the spontaneous curvature, and  $\kappa$  and  $\kappa_G$  are bending and Gaussian moduli respectively, which in  
72 general case of heterogeneous membrane can vary along the surface coordinate. It should be mentioned  
73 that Eq. S8 is different from the standard Helfrich energy by a factor of 2. We take this net effect into  
74 consideration by choosing the value of the bending modulus to be twice that of the standard value of  
75 bending modulus typically used for lipid bilayers [1].

76 Substituting the Helfrich energy function Eq. S8, in Eqs. S4 and S5

$$\underbrace{\kappa\Delta[(H - C)] + 2H\Delta\kappa_G - (\kappa_G)_{;\alpha\beta} + 2\kappa(H - C)(2H^2 - K) - 2\kappa H(H - C)^2}_{\text{Elastic Effects}} = \underbrace{p + 2\lambda H}_{\text{Capillary effects}} + \underbrace{\mathbf{f} \cdot \mathbf{n}}_{\text{Force induced variation}},\tag{S9}$$

77 and

$$\underbrace{\lambda_{,\alpha}}_{\text{Gradient of surface tension}} = \underbrace{-\frac{\partial\kappa}{\partial\theta^\alpha}(H - C)^2}_{\text{bending modulus-induced variation}} + \underbrace{2\kappa(H - C)\frac{\partial C}{\partial\theta^\alpha}}_{\text{Protein-induced variation}} - \underbrace{\frac{\partial\kappa_G}{\partial\theta^\alpha}}_{\text{Gaussian modulus-induced variation}} - \underbrace{\mathbf{f} \cdot \mathbf{a}_\alpha}_{\text{Force induced variation}}.\tag{S10}$$

### 78 2.2.2 Helfrich energy for an anisotropic curvature

79 In order to represent anisotropic curvature generated due to membrane-proteins interactions, we con-  
80 sider the local energy density function as [9, 10]

$$W = \kappa(\theta^\alpha)(H - C(\theta^\alpha))^2 + \kappa(\theta^\alpha)(D - D_0)^2 + \kappa_G(\theta^\alpha)K,\tag{S11}$$

81 where  $D_0$  is spontaneous membrane curvature deviator. Substituting this form of energy density Eq.  
82 S11 in Eqs. S4 and S5 give

$$\begin{aligned} & \underbrace{\kappa\Delta[(H-C)] + 2H\Delta\kappa_G - (\kappa_G)_{;\alpha\beta} + 2\kappa(H-C)(2H^2 - K) - 2\kappa H(H-C)^2}_{\text{Elastic Effects}} \\ & + \underbrace{[\kappa(D-D_0)(\gamma^\alpha\gamma^\beta - \mu^\alpha\mu^\beta)]_{;\beta\alpha} + \kappa(D-D_0)(\gamma^\alpha\gamma^\beta - \mu^\alpha\mu^\beta)b_{\alpha\xi}b_\beta^\xi}_{\text{Deviatoric effects}} = \underbrace{p + 2\lambda H}_{\text{Capillary effects}} + \underbrace{\mathbf{f} \cdot \mathbf{n}}_{\text{Force induced variation}}, \end{aligned} \quad (\text{S12})$$

83 and

$$\begin{aligned} \underbrace{\lambda_{,\alpha}}_{\text{Gradient of surface tension}} &= \underbrace{-\frac{\partial\kappa}{\partial\theta^\alpha}(H-C)^2}_{\text{bending modulus induced variation}} + \underbrace{2\kappa(H-C)\frac{\partial C}{\partial\theta^\alpha}}_{\text{Protein-induced variation}} - \underbrace{\frac{\partial\kappa_G}{\partial\theta^\alpha}}_{\text{Gaussian modulus induced variation}} - \underbrace{\mathbf{f} \cdot \mathbf{a}_\alpha}_{\text{Force induced variation}} + \underbrace{2\kappa(D-D_0)[b_{\alpha\beta}(\gamma^\alpha\gamma^\beta)_{;\eta}]}_{\text{Deviatoric effects}}. \end{aligned} \quad (\text{S13})$$

## 84 2.3 Axisymmetric coordinates

### 85 2.3.1 Equations of motion for isotropic curvature

86 We parameterize a surface of revolution (Fig. 1B) by

$$\mathbf{r}(s, \theta) = r(s)\mathbf{e}_r(\theta) + z(s)\mathbf{k}. \quad (\text{S14})$$

87 We define  $\psi$  as the angle made by the tangent with respect to the horizontal. This gives  $r'(s) =$   
88  $\cos(\psi)$ ,  $z'(s) = \sin(\psi)$ , which satisfies the identity  $(r')^2 + (z')^2 = 1$ . Using this, we define the normal  
89 to the surface as  $\mathbf{n} = -\sin\psi\mathbf{e}_r(\theta) + \cos\psi\mathbf{k}$ , the tangent to the surface in the direction of increasing  
90 arc length as  $\boldsymbol{\nu} = \cos\psi\mathbf{e}_r(\theta) + \sin\psi\mathbf{k}$ , and unit vector  $\boldsymbol{\tau} = \mathbf{e}_\theta$  tangent to the boundary  $\partial\omega$  in the  
91 direction of the surface of revolution (see Fig. 1B).

92 This parameterization yields the following expressions for tangential ( $\kappa_\nu$ ) and transverse ( $\kappa_\tau$ )  
93 curvatures, and twist ( $\tau$ ):

$$\kappa_\nu = \psi', \quad \kappa_\tau = r^{-1}\sin\psi, \quad \tau = 0. \quad (\text{S15})$$

94 The mean curvature ( $H$ ) and Gaussian curvature ( $K$ ) are obtained by summation and multiplica-  
95 tion of the tangential and transverse curvatures

$$H = \frac{1}{2}(\kappa_\nu + \kappa_\tau) = \frac{1}{2}(\psi' + r^{-1}\sin\psi), \quad K = \kappa_\tau\kappa_\nu = \frac{\psi'\sin\psi}{r}. \quad (\text{S16})$$

96 Defining  $L = \frac{1}{2\kappa}r(W_H)'$ , we write the system of first order differential equations governing the  
97 problem as [13],

$$\begin{aligned}
 r' &= \cos \psi, \quad z' = \sin \psi, \quad r\psi' = 2rH - \sin \psi, \\
 rH' &= L + rC' - \frac{r\kappa'}{\kappa}(H - C), \quad \lambda' = 2\kappa(H - C)C' - \kappa'(H - C)^2 - \kappa'_G K - \mathbf{f} \cdot \mathbf{a}_s, \\
 \frac{L'}{r} &= \frac{p}{k} + \frac{\mathbf{f} \cdot \mathbf{n}}{\kappa} + 2H \left[ (H - C)^2 + \frac{\lambda}{\kappa} \right] - 2(H - C) \left[ H^2 + (H - r^{-1} \sin \psi)^2 \right] \\
 &\quad - \frac{\kappa' L}{\kappa r} - \frac{\kappa''_G \sin \psi}{\kappa r} - \frac{\kappa'_G \cos \psi}{\kappa r} \left( 2H - \frac{\sin \psi}{r} \right).
 \end{aligned} \tag{S17}$$

98 The applied boundary conditions are

$$\begin{aligned}
 r(0^+) &= 0, \quad L(0^+) = 0, \quad \psi(0^+) = 0, \\
 z(s_{max}) &= 0, \quad \psi(s_{max}) = 0, \quad \lambda(s_{max}) = \lambda_0.
 \end{aligned} \tag{S18}$$

99 In asymmetric coordinates, the manifold area can be expressed in term of arc length [14, 15]

$$a(s) = 2\pi \int_0^s r(\xi) d\xi \quad \rightarrow \quad \frac{da}{ds} = 2\pi r. \tag{S19}$$

100 Eq. S19 allows us to convert Eq. S17 to an area derivative and prescribe the total area of the  
101 membrane.

102 We non-dimensionalized the system of equations as

$$\begin{aligned}
 \zeta &= \frac{a}{2\pi R_0^2}, \quad x = \frac{r}{R_0}, \quad y = \frac{y}{R_0}, \quad h = HR_0, \quad c = CR_0, \quad l = LR_0, \\
 \lambda^* &= \frac{\lambda R_0^2}{\kappa_0}, \quad p^* = \frac{p R_0^3}{\kappa_0}, \quad f^* = \frac{f R_0^3}{\kappa_0}, \quad \kappa^* = \frac{\kappa}{\kappa_0}, \quad \kappa_G^* = \frac{\kappa_G}{k_0}, \quad K^* = KR_0^2,
 \end{aligned} \tag{S20}$$

103 where  $R_0$  is the radius of the initially circular membrane patch.

104 Rewriting Eq. S17 in terms of Eq. S19 and the dimensionless variables Eq. S20, we get [13]

$$\begin{aligned}
 x\dot{x} &= \cos \psi, \quad xy = \sin \psi \quad x^2\dot{\psi} = 2xh - \sin \psi, \quad x^2\dot{h} = l + x^2\dot{c} - x^2\frac{\dot{\kappa}^*}{\kappa^*}(h - c) \\
 \dot{l} &= \frac{p^*}{\kappa^*} + \frac{\mathbf{f}^* \cdot \mathbf{n}}{\kappa^*} + 2h \left[ (h - c)^2 + \frac{\lambda^*}{\kappa^*} \right] - 2(h - c) \left[ h^2 + (h - x^{-1} \sin \psi)^2 \right] \\
 &\quad - \frac{\dot{\kappa}^*}{\kappa^*} l - x \frac{\ddot{\kappa}_G^*}{\kappa^*} \sin \psi - \frac{\dot{\kappa}_G^*}{\kappa^*} \cos \psi \left( 2h - \frac{\sin \psi}{x} \right), \\
 \dot{\lambda}^* &= 2\kappa^*(h - c) - \dot{\kappa}^*(h - c)^2 \dot{c} - \dot{\kappa}_G^* K^* - \frac{\mathbf{f}^* \cdot \mathbf{a}_s}{x}.
 \end{aligned} \tag{S21}$$

105 The spontaneous curvature field is modeled by a hyperbolic tangent functional as

$$C = \frac{1}{2} [\tanh(g(\zeta - a_0))], \tag{S22}$$

106 where  $a_0$  is the area of applied spontaneous curvature and  $g = 20$  is a constant that ensures a sharp  
107 but smooth transition.

## 108 2.3.2 Force balance along the membrane for isotropic spontaneous curvature

### 109 (i) Constant bending and Gaussian moduli

110

111 A general force balance for a surface  $\omega$ , bounded by a curve  $\partial\omega$ , is (Fig. 2)

$$\int_{\omega} p \mathbf{n} da + \int_{\partial\omega} \tilde{\mathbf{f}} dt + \mathbf{F} = 0, \quad (\text{S23})$$

112 where  $t = r(s)\theta$  is the length along the curve of revolution perimeter,  $p$  is the pressure difference  
 113 across the membrane,  $\tilde{\mathbf{f}}$  is the traction along the curve of revolution  $t$  and  $\mathbf{F}$  is any externally applied  
 114 force on the membrane. Along any circumferential curve on the membrane at constant  $z$ , the traction  
 115 is given by [6, 11]

$$\tilde{\mathbf{f}} = \tilde{f}_{\nu} \boldsymbol{\nu} + \tilde{f}_n \mathbf{n} + \tilde{f}_{\tau} \boldsymbol{\tau}, \quad (\text{S24})$$

116 where

$$\begin{aligned} \tilde{f}_n &= (\tau W_K)' - 1/2(W_H)_{,\nu} - (W_K)_{,\beta} \tilde{b}^{\alpha\beta} \nu_{\alpha}, \\ \tilde{f}_{\nu} &= W + \lambda - \kappa_{\nu} M, \\ \tilde{f}_{\tau} &= -\tau M, \end{aligned} \quad (\text{S25})$$

117 and  $\tilde{f}_n$ ,  $\tilde{f}_{\nu}$  and  $\tilde{f}_{\tau}$  are force per unit length acting along the normal  $\mathbf{n}$ , tangent  $\boldsymbol{\nu}$  to the surface, and  
 118 transverse tangent  $\mathbf{e}_{\theta}$  respectively. In Eq. S25,  $M$  is the bending couple given by

$$M = \frac{1}{2} W_H + \kappa_{\nu} W_K. \quad (\text{S26})$$

119 Because  $\tau = 0$  (no twist) in asymmetric coordinates, the normal and tangential tractions become

$$\tilde{f}_n = -\kappa(H' - C'), \quad (\text{S27a})$$

$$\tilde{f}_{\nu} = \kappa(H - C)(H - C - \psi') + \lambda. \quad (\text{S27b})$$

120 Projecting Eq. S24 onto the orthogonal bases  $\mathbf{e}_r$  and  $\mathbf{k}$  gives us the equation for axial and radial  
 121 tractions [6, 11],

$$\tilde{f}_r = \underbrace{\kappa(H' - C') \sin \psi}_{\text{Curvature gradient contribution}} + \underbrace{\kappa(H - C)(H - C - \psi') \cos \psi}_{\text{Curvature contribution}} + \underbrace{\lambda \cos \psi}_{\text{Tension contribution}}, \quad (\text{S28a})$$

$$\tilde{f}_z = \underbrace{-\kappa(H' - C') \cos \psi}_{\text{Curvature gradient contribution}} + \underbrace{\kappa(H - C)(H - C - \psi') \sin \psi}_{\text{Curvature contribution}} + \underbrace{\lambda \sin \psi}_{\text{Tension contribution}}. \quad (\text{S28b})$$

122

123 Because  $\int_{\partial\omega} dt = 2\pi r$ , the applied force in the axial direction can be evaluated by substituting  
 124 Eqs. S28a, and S28b into Eq. S23,

$$-\mathbf{F}_z = \underbrace{2\pi r \left( -\kappa(H' - C') \cos \psi \right) + \kappa(H - C)(H - C - \psi') \sin \psi + \lambda \sin \psi}_{\text{Force due to traction}} + \underbrace{2\pi \int_0^s pr(\xi) \cos \psi d\xi}_{\text{Force due to pressure}}. \quad (\text{S29})$$

125 This can be rewritten in terms of tractions as

$$-\mathbf{f}_z = \underbrace{\left( -\kappa(H' - C') \cos \psi \right) + \kappa(H - C)(H - C - \psi') \sin \psi + \lambda \sin \psi}_{\text{axial traction}} + \underbrace{\frac{\int_0^s pr(\xi) \cos \psi d\xi}{r}}_{\text{Traction due to pressure}}, \quad (\text{S30})$$

126 where  $\mathbf{f}_z = \frac{\mathbf{F}_z}{2\pi r}$ . The energy per unit length  $\xi$ , or “effective line tension,” can be found by  
127 integrating Eq. S28a along the perimeter boundary  $\partial\omega$ ,

$$\xi = 2\pi r \left[ \underbrace{\kappa(H - C)(H - C - \psi') \cos \psi}_{\text{Curvature contribution}} + \underbrace{\lambda \cos \psi}_{\text{Tension contribution}} + \underbrace{\kappa(H' - C') \sin \psi}_{\text{Curvature gradient contribution}} \right]. \quad (\text{S31})$$

### 128 (ii) Spatially heterogenous bending and Gaussian moduli

129

130 For a membrane with a spatially heterogenous bending and Gaussian moduli, the normal and  
131 tangential tractions in Eqs. S27a, S27b become

$$\tilde{f}_n = -\kappa(H' - C') - \kappa'(H - C) - \frac{\sin \psi}{r} \kappa'_G, \quad (\text{S32a})$$

$$\tilde{f}_v = \kappa(H - C)(H - C - \psi') + \lambda. \quad (\text{S32b})$$

132 The radial and axial tractions in Eqs. S28a and S28b can be rewritten for the general case as

$$\tilde{f}_r = \kappa(H' - C') \sin \psi + \kappa(H - C)(H - C - \psi') \cos \psi + \lambda \cos \psi + \underbrace{\kappa'(H - C) \sin \psi}_{\text{Variable bending modulus}} + \underbrace{\frac{\sin \psi^2}{r} \kappa'_G}_{\text{Variable Gaussian modulus}}, \quad (\text{S33a})$$

$$\tilde{f}_z = -\kappa(H' - C') \cos \psi + \kappa(H - C)(H - C - \psi') \sin \psi + \lambda \sin \psi - \underbrace{\kappa'(H - C) \cos \psi}_{\text{Variable bending modulus}} - \underbrace{\frac{\sin \psi \cos \psi}{r} \kappa'_G}_{\text{Variable Gaussian modulus}}. \quad (\text{S33b})$$

133 Similarly, the axial force and energy per unit lengths in Eqs. S29, S31 can be rewritten as

$$\mathbf{F}_z = \left[ \underbrace{2\pi r(-\kappa(H' - C') \cos \psi + \kappa(H - C)(H - C - \psi') \sin \psi + \lambda \sin \psi - \kappa'(H - C) \cos \psi - \frac{\sin \psi \cos \psi}{r} \kappa'_G)}_{\text{Force due to traction}} \right] + \underbrace{2\pi \int_0^s pr(\xi) \cos \psi d\xi}_{\text{Force due to pressure}}, \quad (\text{S34a})$$

$$\xi = 2\pi r \left[ \underbrace{\kappa(H - C)(H - C - \psi') \cos \psi}_{\text{Curvature contribution}} + \underbrace{\lambda \cos \psi}_{\text{Tension contribution}} + \underbrace{\kappa(H' - C') \sin \psi}_{\text{Curvature gradient contribution}} + \underbrace{\kappa'(H - C) \sin \psi}_{\text{Variable bending contribution}} + \underbrace{\frac{\sin \psi^2}{r} \kappa'_G}_{\text{Variable Gaussian contribution}} \right]. \quad (\text{S35a})$$

### 134 2.3.3 Equation of motion for anisotropic spontaneous curvatures

135 By using the surface parametrization Eq. S14, we are able to define the curvature deviator ( $D$ ) as

$$D = \frac{1}{2}(\kappa_\tau - \kappa_\nu) = \frac{1}{2}(r^{-1} \sin \psi - \psi') = r^{-1} \sin \psi - H, \quad (\text{S36})$$

136 Here, we need to revise our defined  $L$  as  $L = \frac{1}{2\kappa} r[(W_H)' - (W_D)']$ , therefore for uniform bending  
137 and Gaussain modulii, the system of first order differential equations modify as [8],

$$\begin{aligned} r' &= \cos \psi, & z' &= \sin \psi, & r\psi' &= 2rH - \sin \psi, \\ 2rH' &= L + rC' - rD_0' + 2H \cos(\psi) - \frac{2 \cos(\psi) \sin(\psi)}{r}, \\ \lambda' &= 2\kappa(H - C)C' + 2\kappa\left(\frac{\sin(\psi)}{r} - H - D_0\right)D_0' - \mathbf{f} \cdot \mathbf{a}_s, \\ \frac{L'}{r} &= \frac{p}{k} + \frac{\mathbf{f} \cdot \mathbf{n}}{\kappa} + 2H \left[ (H - C)^2 + \frac{\lambda}{\kappa} + \left(\frac{\sin(\psi)}{r} - H - D_0\right)^2 - 2\left(\frac{\sin(\psi)}{r} - H - D_0\right)\left(\frac{\sin(\psi)}{r} - H\right) \right] \\ &- 2(H - C) \left[ H^2 + (H - r^{-1} \sin \psi)^2 \right] - 2\frac{\cos(\psi)}{r} \left[ \frac{H \cos(\psi)}{r} - \frac{\sin(\psi) \cos(\psi)}{r^2} - \frac{D_0'}{2} - \frac{C'}{2} \right] + \frac{L \cos(\psi)}{r^2}. \end{aligned} \quad (\text{S37})$$

### 138 2.3.4 Force balance along the membrane for anisotropic spontaneous curvatures

139 By considering the anisotropic spontaneous curvature contribution to the strain energy S11, the trac-  
140 tion components in Eq. S25 and bending couple in Eq. S26 are modified



$$\begin{aligned}\tilde{f}_n &= (\tau W_K)' - 1/2(W_H)_{,\nu} - (W_K)_{,\beta} \tilde{b}^{\alpha\beta} \nu_\alpha + \frac{1}{2}(W_D)_{,\nu} - (W_D \gamma^\alpha \gamma^\beta)_{;\beta} \nu_\alpha - (W_D \gamma^\alpha \gamma^\beta \nu_\beta \tau_\alpha)', \\ \tilde{f}_\nu &= W + \lambda - \kappa_\nu M, \\ \tilde{f}_\tau &= -\tau M,\end{aligned}\tag{S38}$$

141 and

$$M = \frac{1}{2}W_H + \kappa_\nu W_K + W_D \gamma^\alpha \gamma^\beta \nu_\beta \nu_\alpha - \frac{1}{2}W_D.\tag{S39}$$

142 In asymmetric coordinates, the normal and tangential tractions simplify as

$$\tilde{f}_n = -\kappa(H' - C' - D' + D'_0) = -\kappa(2H' - \frac{\psi' \cos(\psi)}{r} + \frac{\sin(\psi) \cos(\psi)}{r^2} - C' + D'_0),\tag{S40a}$$

$$\begin{aligned}\tilde{f}_\nu &= \kappa(H - C)(H - C - \psi') + \lambda + \kappa(D - D_0)(D - D_0 + \psi') \\ &= \kappa(H - C)(H - C - \psi') + \lambda + \kappa(\frac{\sin(\psi)}{r} - H - D_0)(\frac{\sin(\psi)}{r} - H - D_0 + \psi').\end{aligned}\tag{S40b}$$

143 Using Eqs. S38 to simplify the traction equations

$$\tilde{f}_n = -\kappa \frac{L}{r},\tag{S41a}$$

$$\tilde{f}_\nu = \kappa(H - C)(\frac{\sin(\psi)}{r} - H - C) + \lambda + \kappa(\frac{\sin(\psi)}{r} - H - D_0)(H - D_0).\tag{S41b}$$

144 Axial force can then be written as

$$F_z = 2\pi r \left( \kappa \frac{L}{r} \sin(\psi) + (\kappa(H - C)(\frac{\sin(\psi)}{r} - H - C) + \lambda + \kappa(\frac{\sin(\psi)}{r} - H - D_0)(H - D_0)) \cos(\psi) \right).\tag{S42}$$

## 145 2.4 Asymptotic approximation for small radius

146 To ensure continuity at the poles, we use  $L = H' = 0$  as a boundary condition in our simulations.  
147 However, this boundary condition reduces the expressions for tractions (Eqs. S28b, S28a) to zero  
148 at the pole. To avoid this discrepancy, we derive an asymptotic expression for tractions at small arc  
149 length. We proceed by assuming that the pole in Eq. S21 is at  $x = 0$  and choose a rescaled variable  
150 given by

$$X = \frac{x}{\epsilon}.\tag{S43}$$

151 Here,  $\epsilon$  is a small parameter, so that  $X$  is order of one. We can extend this to other small variables  
152 in Eq. S21 near the pole to get

$$y = y_0 + Y\epsilon, \quad \psi = P\epsilon, \quad s = S\epsilon,\tag{S44}$$

153 where  $Y, P, S$  are the corresponding rescaled parameters and  $y_0$  is membrane height at the pole.

154 In the simple case with no spontaneous curvature ( $C = 0$ ), no external force  $\mathbf{f} = 0$  and no pressure  
155 difference  $p = 0$ , we substitute Eqs. S44 and S43 into Eq. S21 and use a Taylor expansion to get

$$\begin{aligned} \dot{X} &= 1 - \frac{(P\epsilon)^2}{2}, & \dot{Y} &= P\epsilon - \frac{(P\epsilon)^3}{3!}, & \dot{P} &= 2h - \frac{P}{X} + \frac{\epsilon^2 P^3}{3! X}, & X\dot{h} &= l, \\ & & & & \dot{l} &= \epsilon^2 2Xh \left[ \frac{\lambda^*}{k^*} - \left( h - \frac{P}{X} + \frac{P^3 \epsilon^2}{X 3!} \right)^2 \right], \\ & & & & \dot{\lambda}^* &= 0. \end{aligned} \quad (\text{S45})$$

156 We look for a solutions with form of

$$\begin{aligned} h &= h^0 + \epsilon h^1 + \text{ord}(\epsilon^2), & X &= X^0 + \epsilon X^1 + \text{ord}(\epsilon^2), & Y &= Y^0 + \epsilon Y^1 + \text{ord}(\epsilon^2), \\ l &= l^0 + \epsilon l^1 + \text{ord}(\epsilon^2), & P &= P^0 + \epsilon P^1 + \text{ord}(\epsilon^2), & \lambda^* &= \lambda^{*0} + \epsilon \lambda^{*1} + \text{ord}(\epsilon^2). \end{aligned} \quad (\text{S46})$$

157 The leading order terms in Eq. S46 are

$$\dot{X}^0 = 1, \quad \dot{Y}^0 = 0, \quad \dot{P}^0 = 2h^0 - \frac{P^0}{X^0}, \quad \dot{h}^0 = \frac{l^0}{X^0}, \quad \dot{l}^0 = 0, \quad \dot{\lambda}^{*0} = 0. \quad (\text{S47})$$

158 Integrating the differential equations in Eq. S47, we get

$$\begin{aligned} X^0 &= S, & Y^{*0} &= Y_0, & P^0 &= S \left( H_0 + L_0 \log(S) - \frac{L_0}{2} \right), \\ h^0 &= L_0 \log(S) + H_0, & l^0 &= L_0, & \lambda^0 &= \lambda_0, \end{aligned} \quad (\text{S48})$$

159 where  $Y_0, H_0$  and  $L_0, \lambda_0$  are integration constants. We then look at order  $\epsilon^1$  terms in Eq. S45

$$\dot{X}^1 = 0, \quad \dot{Y}^1 = P, \quad \dot{P}^1 = 2h^1 + \frac{P^0 X^1}{X^{02}}, \quad X^0 \dot{h}^1 + X^1 \dot{h}^0 = l^1, \quad \dot{l}^1 = 0, \quad \dot{\lambda}^{*1} = 0. \quad (\text{S49})$$

160 The first order terms are thus given by

$$\begin{aligned} X^1 &= X_1, & Y^1 &= P_1 S + Y_1, & l^1 &= L_1, & \lambda^{*1} &= \lambda_1, & h^1 &= L_1 \log(S) + \frac{X_1 L_0}{S} + H_1, \\ P^1 &= 2S(L_1 \log(S) - L_1 + H_1) + X_1 L_0 \log(S) \left( \frac{3}{2} + \frac{\log(S)}{2} + \frac{H_0}{L_0} \right). \end{aligned} \quad (\text{S50})$$

161 Combining the leading order and first order terms and substituting into Eq. S46, our system of  
162 variables can be written as

$$\begin{aligned}
 X &= S + \epsilon X_1, & Y &= Y_0 + \epsilon(P_1 S + Y_1), & l &= L_0 + \epsilon L_1, & \lambda^* &= \lambda_0 + \epsilon \lambda_1, \\
 P &= S \left( H_0 + L_0 \log(S) - \frac{L_0}{2} \right) + \epsilon \left( 2S(L_1 \log(S) - L_1 + H_1) + X_1 L_0 \log(S) \left( \frac{3}{2} + \frac{\log(S)}{2} + \frac{H_0}{L_0} \right) \right), \\
 h &= H_0 + L_0 \log(S) + \epsilon \left( L_1 \log(S) + \frac{X_1 L_0}{S} + H_1 \right).
 \end{aligned} \tag{S51}$$

163 We are interested in the asymptotic expansion of mean curvature near the pole, which is given by

$$h = H_0 + L_0 \log(S) + \epsilon \left( L_1 \log(S) + \frac{X_1 L_0}{S} + H_1 \right). \tag{S52}$$

164 This can be rewritten as

$$\begin{aligned}
 h &= H_0 + L_0 \log(A + S - A) + \epsilon H_1, \\
 h &= H_0 + L_0 \log(A) + L_0 \log\left(1 + \frac{S - A}{A}\right) + \epsilon \left( L_1 \log(S) + \frac{X_1 L_0}{S} + H_1 \right),
 \end{aligned} \tag{S53}$$

165 where  $A$  is a constant. If  $\frac{S-A}{A}$  is small, we can perform a Taylor expansion around  $S = A$  to get  
 166 the leading order

$$\begin{aligned}
 h &= H_0 + L_0 \log(A) + L_0 \left( \frac{S - A}{A} - \frac{1}{2} \left( \frac{S - A}{A} \right)^2 \dots \right) \\
 h &\sim H_0 + L_0 \log(A) - L_0 + L_0 \left( \frac{S}{A} \right) \\
 h &\sim H_0 + L_0 \left( \log(A) - 1 + \frac{S}{A} \right) \\
 h &\sim H_0 + L_0 \log(A) - L_0 + L_0 \left( \frac{s}{A\epsilon} \right) \\
 h &\sim C_1 + C_2 s,
 \end{aligned} \tag{S54}$$

167 where  $C_1$  and  $C_2$  are constants. This shows that the mean curvature can be approximated as a linear  
 168 solution near the pole for  $S \sim A$  or  $s \sim A\epsilon$ . In our image analysis, inaccuracies near the pole begin at  
 169 orders of magnitude of  $10^{-2}$ . At this range, we can approximate a linear solution for mean curvature.

170 Similarly, we consider an asymptotic expansion for  $\psi$  near the pole at leading order

$$P = S \left( H_0 + L_0 \log(S) - \frac{L_0}{2} \right), \tag{S55}$$

171 which can be rewritten as

$$\psi = s \left( H_0 + L_0 \log(s) - L_0 \epsilon - \frac{L_0}{2} \right) \rightarrow \psi = s (D_1 + D_2 \log(s)), \tag{S56}$$

172 where  $D_1$  and  $D_2$  are constants. We can now substitute the approximation for mean curvature and  $\psi$   
 173 near the pole into Eq. S28a and S28b to get

$$\tilde{f}_r \sim -\kappa(C_1 + C_2s - C)(C_1 + C_2s - C - D_2 - D_1 - D_2 \log(s)) - \lambda, \quad (\text{S57a})$$

$$\tilde{f}_z \sim -\kappa(C_2 - C'). \quad (\text{S57b})$$

174 Using  $\log(s) = \log(s + A - A) = \log(A) + \log(1 + \frac{s-A}{A})$  and expanding around  $s \sim A$ , Eq.  
 175 S57b can be simplified to

$$\tilde{f}_r \sim -\kappa(F_1s^2 + F_2s + F_3) - \lambda, \quad (\text{S58a})$$

$$\tilde{f}_z \sim -\kappa(C_2), \quad (\text{S58b})$$

176 where  $F_1, F_2$  are constants. We can thus approximate radial traction as quadratic in arc length near the  
 177 pole, while axial traction can be correspondingly approximated as constant. In this work, we choose  
 178 to start the asymptotic solution at the local minimum of mean curvature near the pole, which is  $\epsilon \sim$   
 179 0.1.

### 180 **3 Additional tether and bud formation simulations**

#### 181 **3.1 Tubes pulled against pressure**

182 In Fig. 3, we set  $p = 0$  and  $\lambda_0 = 0.02$  pN/nm. However, pressure plays an important role in tether  
 183 formation in certain biological contexts and thus cannot be ignored [16]. We investigated the role  
 184 pressure plays during tether formation by finding pressure that produces a tube of similar radius to  
 185 that obtained in Fig. 3. To do this, we first define a natural length scale for the system,  $R_0$ , by the  
 186 expected equilibrium radius of a membrane tube obtained by minimization of the free energy of the  
 187 membrane [17].

188 In absence of the pressure, external force, spontaneous curvature and Gaussian modulus, we can  
 189 write the free energy of the membrane as

$$E = \int_{\omega} (\kappa H^2 + \lambda) da. \quad (\text{S59})$$

190 For a tube of length  $L$  and radius  $R$ , the free energy, ignoring the mean curvature of the cap  
 191 ( $H = \frac{1}{2R}$ ), can be written as

$$\mathcal{W}_{tube} = \left( \frac{\kappa}{4R^2} + \lambda \right) 2\pi RL. \quad (\text{S60})$$

192 The balance between the surface tension, which acts to reduce the radius, and the bending rigidity  
 193 sets the equilibrium radius  $R_0$ . Taking  $\partial \mathcal{W}_{tube} / \partial R = 0$  we obtain

$$R_0 \equiv \frac{1}{2} \sqrt{\frac{\kappa}{\lambda}}. \quad (\text{S61})$$

194 We can perform a similar analysis with pressure replacing surface tension. The free energy of the  
 195 membrane Eq. S59 can be rewritten as

$$E = \int_{\omega} \kappa H^2 da + pV. \quad (\text{S62})$$

196 Again for a tube of length  $L$  and radius  $R$ , the free energy can be written as

$$\mathcal{W}_{tube} = \left( \frac{\kappa}{4R^2} \right) 2\pi RL + p\pi R^2 L. \quad (\text{S63})$$

197 Here, the balance between pressure, which acts to reduce the radius, and the bending rigidity sets  
198 the equilibrium radius  $R_0$ . Taking  $\partial\mathcal{W}_{tube}/\partial R = 0$  we obtain

$$R_0 \equiv \sqrt[3]{\frac{\kappa}{4p}}. \quad (\text{S64})$$

199 Comparing Eq. S64 and Eq. S61, we can find an equivalent pressure to the surface tension needed  
200 for achieving a tube of radius  $R_0$ ,

$$\begin{aligned} \sqrt[3]{\frac{\kappa}{4p}} &= \frac{1}{2} \sqrt{\frac{\kappa}{\lambda}}, \\ p &= \frac{2\lambda\sqrt{\lambda}}{\sqrt{\kappa}}. \end{aligned} \quad (\text{S65})$$

201 Eq. S65 gives an equivalent pressure  $p = 0.3$  kPa for a surface tension of  $0.02$  pN/nm. We  
202 perform the tether pulling simulation for this value of pressure, such that the pressure acts inward for  
203 every non-zero height. Surface tension is set to zero at the base. Using the expressions for traction  
204 incorporating pressure (Eqs. S4, S5, S28), we can plot the axial, radial (Fig. S2A and B), normal and  
205 tangential tractions (Fig. S2D and E). The traction distributions show similar behaviour to Fig. 3 in  
206 the main text. Using Eq. S29, the applied force matches the difference between pressure force in the  
207 axial direction and the force due to the axial traction (Fig. S2F). Panel C shows that energy per unit  
208 length has a similar behavior to the trend in Fig. 3D of the main text.

### 209 **3.2 Tubes pulled against pressure and surface tension**

210 Yeast endocytic buds experience a very large pressure on the order of  $1$  MPa [16, 18]. This large  
211 hydrostatic pressure intrinsically represents the effect of the matrix during endocytosis. In Fig. S3,  
212 we perform a tether pulling simulation for pressure  $1$  MPa, surface tension  $0.02$  pN/nm and bending  
213 modulus of  $32000$  pN · nm, suggested by [16]. Fig. S3A and B show the axial and radial tractions for  
214 four membrane shapes as the tether is pulled out. Because of the large pressure, the radius of the tether  
215 is very small. A consequence of the small radius is a positive radial traction at the neck, where the  
216 membrane wants to push out. Axial and radial traction are both constant over cylindrical parts of the  
217 tether. Energy per unit length (seen in Fig S3C) shows large negative values at the neck and near the  
218 pole, similar to cases before. The normal and tangential traction distributions (Fig. S3D and E) along  
219 the membrane and are also qualitatively similar to the previous cases, but differ in magnitude due to  
220 larger bending modulus, with tractions being almost two orders of magnitude larger. In Fig. S3F, the  
221 external force is plotted vs the height of the tether and matches the difference between pressure force  
222 and axial force (Eq. S34a). In the presence of pressure, a much larger force is required to pull out the  
223 tube – the maximum force is almost  $600$  times larger than the case without pressure.

### 224 **3.3 Axial and radial tractions in bud formation**

225 The axial and radial tractions for the budding simulation, Fig. 5 of the main text, are shown in Fig  
226 S4. The axial traction along the membrane is negligible in all the stages of bud formation (Fig. S4A).  
227 The axial force due to traction Eq. S29 depends on three different terms, curvature, curvature gradient  
228 and surface tension. The calculated axial force at the interface is zero because tension term cancels  
229 out the force due to curvature gradient and the force associated with curvature is zero by itself (Fig.  
230 S4B). This means that neck formation is purely regulated by radial stresses (Fig. S4C). For small  
231 deformations, the radial traction is positive throughout, which shows that the membrane works to  
232 oppose the deformation. However, with the formation of U-shaped caps, radial traction changes sign  
233 and acts inward, representing the membrane's tendency to form small necks.

### 234 **3.4 Bud formation with a rigid protein coat**

235 In Fig.5, we assumed the bending rigidity is homogeneous all along the membrane. However, various  
236 force microscopy measurements have shown that bending rigidity along the protein coat is much larger  
237 than the bare membrane [19]. To investigate the effect of spatial heterogeneity in the bending moduli  
238 on bud morphology and traction distributions, we repeated the simulation in Fig. 5, assuming that  
239 the bending rigidity along the spontaneous curvature field is 7.5 times larger than the bare membrane  
240 ( $\kappa_{\text{coat}} = 7.5 \times \kappa = 2400$  pN/nm (Fig. S5A)). Comparing these shapes to those in main text (Fig.  
241 5), we see that in this case, a larger spontaneous curvature is required to form a narrow neck because  
242 the membrane is stiffer and harder to bend. Using Eqs. S32a, S32b and S35a, the normal, tangential  
243 tractions and energy per unit length distributions are plotted along the shapes (Fig. S5B, C and D).  
244 The positive normal traction distribution indicates the resistance of the membrane to bending. Similar  
245 to the case of a homogeneous membrane, the line tension can be divided into two sections. In the  
246 first section (small spontaneous curvature), tent shaped buds form and the line tension changes sign  
247 from positive to negative. Here, the average difference in the line tension magnitude between the two  
248 cases is less than 1 pN. However, in the second section (large spontaneous curvature), the line tension  
249 magnitude decreases with the formation of an  $\Omega$ -shaped bud, and the average difference in the line  
250 tension magnitude is significantly larger ( $\sim 4$  pN) (Fig. S5E).

### 251 **3.5 Bud and tube formation in arc length**

252 In Figs.5 and 3, we fixed the total area of the membrane and increased the magnitude of the spon-  
253 taneous curvature and applied force respectively (Eqs. S21). However, in active non-equilibrium  
254 processes such as endocytosis, the available membrane area can vary. One possible way to consider  
255 the impact of the membrane area adjustment is solving the equations in arc length (Eqs. S17) instead  
256 of area. Here, we repeated the simulations of Figs. 5 and 3 for a fixed arc length of membrane. In the  
257 case of the bud, we fixed the arc length coverage of the coat and increased the spontaneous curvature  
258 from 0 to  $C = -0.032$  nm<sup>-1</sup> (Fig.S6A). The tractions and energy per unit length distribution along dif-  
259 ferent shapes are shown in Fig. S6B-D. Evidently, independent of whether the available area of the  
260 membrane is fixed or not, the energy per unit length at the interface is between 6 to -6 pN and changes  
261 sign from positive to negative with formation of a neck (Fig. S6E). In the case of a tube simulation  
262 for a fixed arc-length (Fig. S7), we can replicate the force-displacement curve in the main text (Fig.  
263 S7B and Fig. 3B), which is for a fixed membrane area. The tractions and energy per unit length  
264 distribution along a few shapes are shown in Fig. S7A,C,D.

### 265 **3.6 Bud formation with cytoskeleton forces**

266 We consider the effects of the cytoskeleton during endocytosis as previously described in [13]. In  
267 Fig. S8, we apply actin-mediated forces on a U-shaped bud such that actin polymerizes in the form  
268 of a ring at the base of the endocytic pit with the network attached to the protein coat [13, 20]. Fig.  
269 S8B-D show the tractions and energy per unit length distributions along the initial and final shapes as  
270 the membrane is pulled out. Fig. S8E shows the match obtained between the applied force and axial  
271 force calculated at the edge of the protein coat. Here, we note that calculating the axial force at the  
272 base predicts zero applied force – a consequence of the actin ring acting at the base that integrates to  
273 zero. To further emphasize this point, we repeated the simulation without this downward force at the  
274 base (Fig. S9) and show that the match between applied force and axial force can be obtained both at  
275 the base of the membrane and at the edge of the protein coat. Fig S9B shows that the large tangential  
276 traction along the neck is limited to a smaller region (red) compared to Fig. S8B, because without  
277 considering the actin ring force at the base, there is lesser axial stretch along the bud neck.

### 278 **3.7 Bud formation with anisotropic spontaneous curvature**

279 Proteins induce a highly anisotropic local spontaneous curvature [9, 10]. To model this effect, we used  
280 a modified energy functional (Eq. S11) that includes deviatoric curvature effects. This then can be  
281 written as the shape equation (Eq. S12) and tangential variation equation (Eq. S13). We solve this  
282 system of equations for a deviatoric curvature field applied over the cylindrical portion of a membrane  
283 tube (Fig. S10, [20]). Fig S10A shows neck formation in a membrane tube with increasing deviatoric  
284 curvature. The membrane invagination obtained resembles the PM shape seen during assembly of  
285 rvs proteins at the neck of a tube [20]. We note here that we apply both a spontaneous curvature  
286 and deviatoric curvature with opposite signs. Fig. S10D shows that the energy per unit length at  
287 both interfaces matches the trend seen in Fig. 6 leading up to neck formation. Fig. S10E shows  
288 that the axial forces can be matched to applied forces. Axial forces decrease as a consequence of the  
289 membrane height being constrained.

### 290 **3.8 Additional sensitivity analysis**

291 Fig. 8B shows that the axial force ( $F_z$ ) is not sensitive to error in membrane tension for a fixed shape of  
292 a membrane tether. This is because the calculation of axial force was performed at the base of the PM  
293 invagination where the membrane is nearly flat ( $\psi = 0$ ). In Fig. S11, we perform the same analysis  
294 by repeating the calculation at two other locations – (1) at the edge of the area of applied force, (2)  
295 at the point of zero mean curvature. Fig. S11A shows these points (1) and (2) along the membrane  
296 shape corresponding to the peak of the force-displacement graph in Fig. 3B. The error in ( $F_z$ ) due to  
297 membrane tension increases for calculations at regions of larger tangent angle  $\psi$  (Fig. S11B, C). Thus,  
298 to minimize error in axial force, we choose to perform traction calculations at base of the membrane.

299 **4 Supplementary figures**

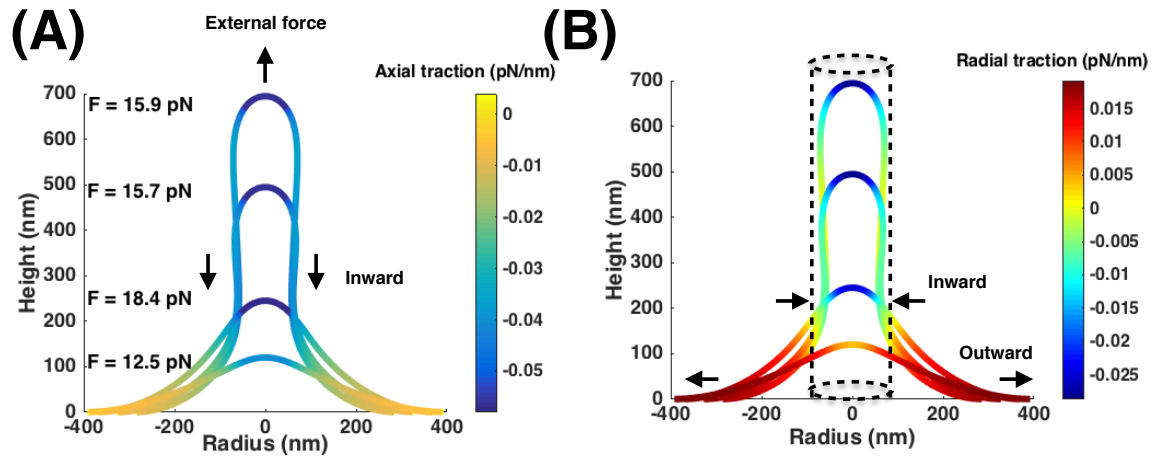

Figure S1: Axial and radial traction (Eqs. S28b, S28a) distribution plotted along the same membrane shapes as in Fig. 3A–C. (A) Axial traction distribution. The axial traction is constant along the tube. (B) Radial traction distribution. The dotted line is the stable cylindrical geometry.



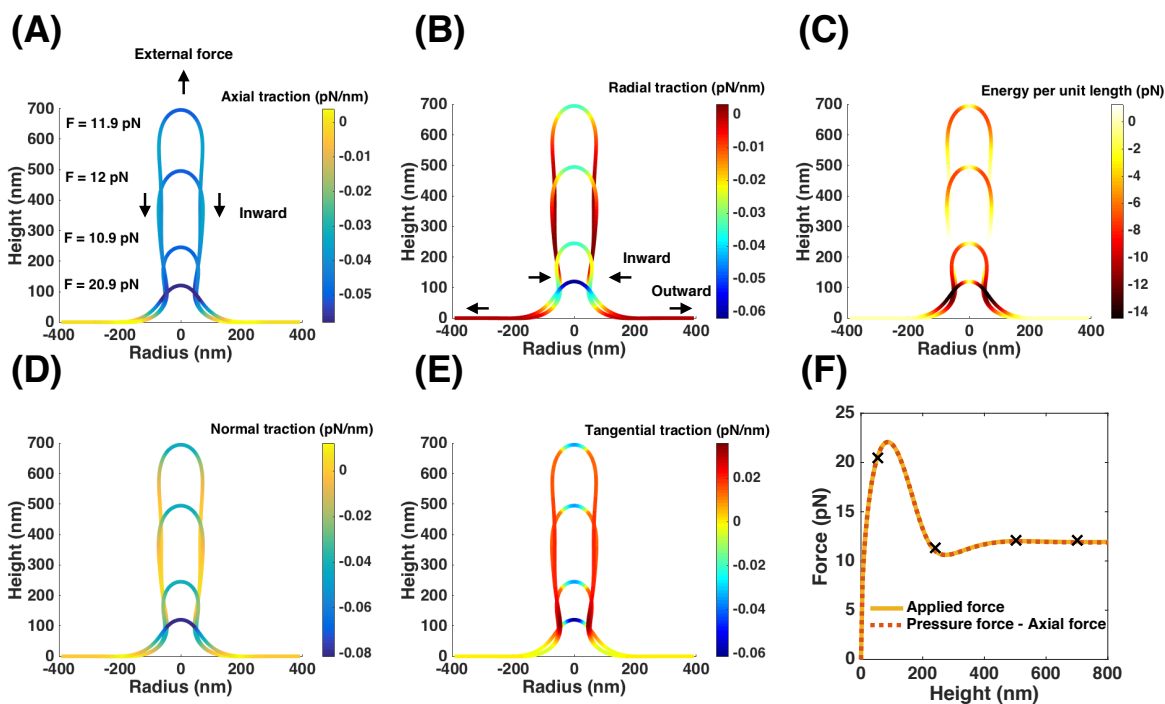

Figure S2: Tether pulling simulation for the pressure of 0.3 kPa, bending modulus  $320 \text{ pN} \cdot \text{nm}$ , no surface tension at the boundary ( $\lambda_0 = 0$ ), and a point force. (A) Axial traction distribution along the tether. (B) Radial traction distribution. We find a negative value at the neck and a positive value at the base. (C) Energy per unit length (Eq. 6) plotted along the shapes. We observe a large value at the neck - predicting an ‘effective’ line tension of 11 pN for a tether of height 700 nm. (D) Normal traction distribution. It is large and negative over the area of applied force. (E) Tangential traction distribution. (F) Applied force and the difference between the calculated pressure and axial force (Eq. S29) plotted as a function of tether height.

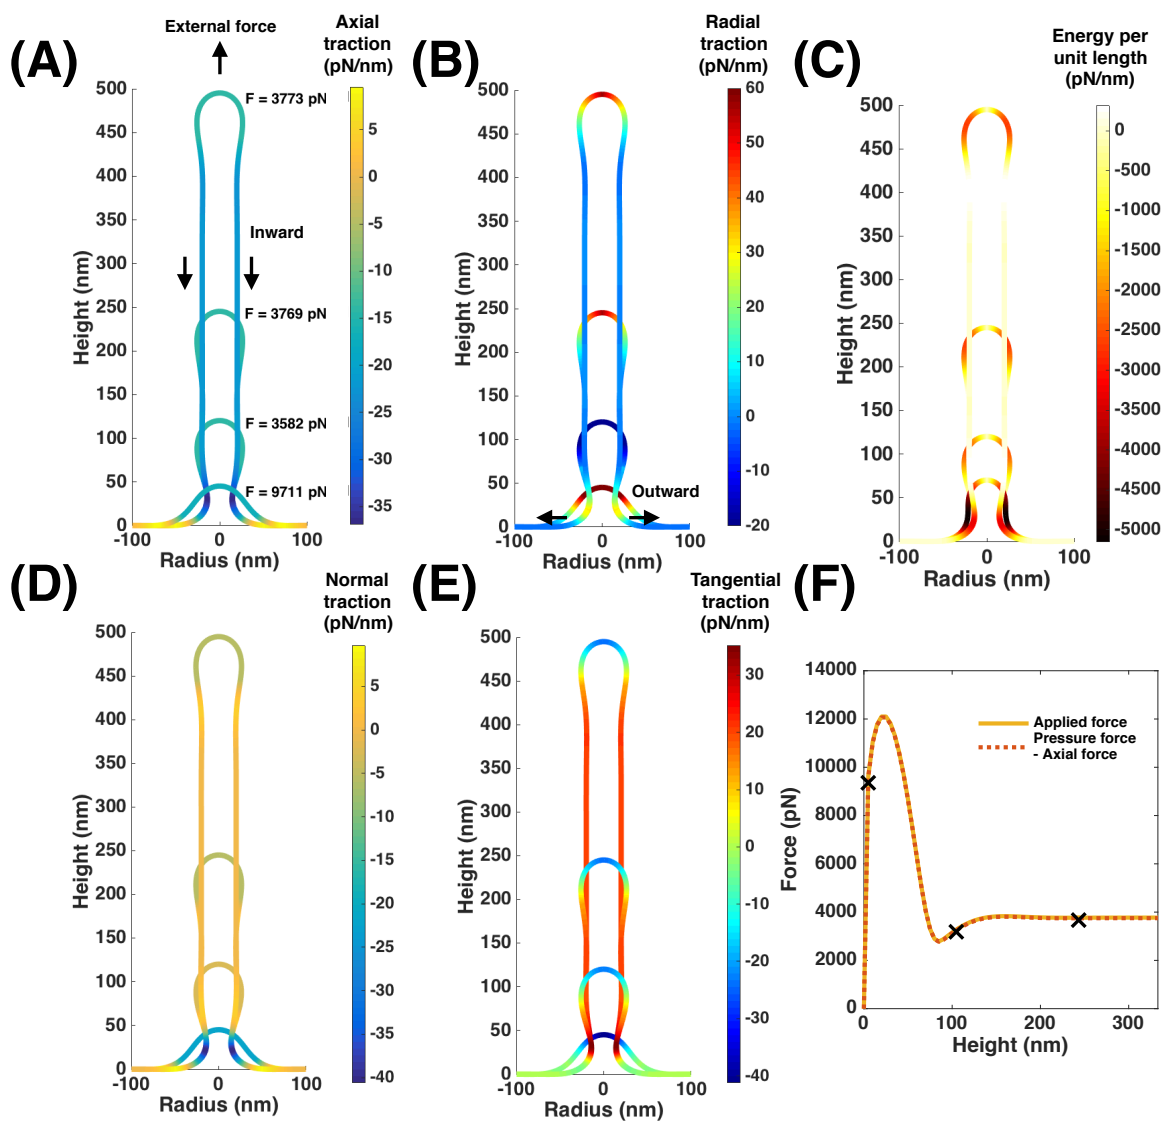

Figure S3: Tether pulling simulation for a pressure of 1 MPa, bending modulus  $32000 \text{ pN} \cdot \text{nm}$ , surface tension at the boundary ( $\lambda_0 = 0.02 \text{ pN/nm}$ ), and a point force. (A) Axial traction distribution along the tether for four chosen membrane shapes. (B) Radial traction distribution along the membrane shapes in (A). (C) Energy per unit length (Eq. S31) plotted along the membrane shapes in (A). We observe a large value at the neck. (D) Normal traction distribution along the membrane shapes in (A). It is large and negative over the area of applied force and at the neck. (E) Tangential traction distribution along the membrane shapes in (A). (F) Applied force and the difference between the calculated pressure and axial force (Eq. S29) plotted as a function of tether height.

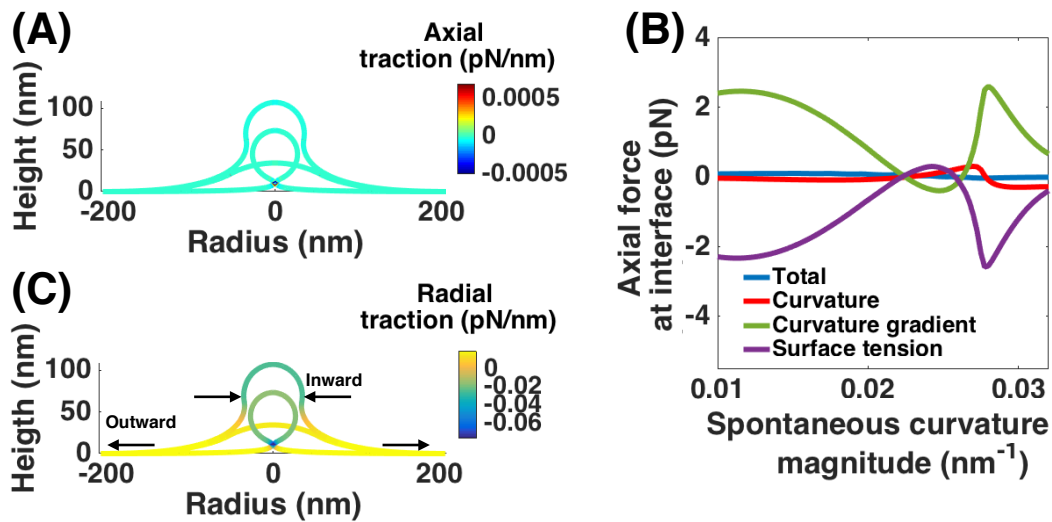

Figure S4: Bud formation from a flat membrane for increasing spontaneous curvature and a constant area of spontaneous curvature field  $A = 10,053 \text{ nm}^2$ . The spontaneous curvature magnitude increases from  $C = 0$  to  $C = -0.034 \text{ nm}^{-1}$ , the bending modulus is  $\kappa = 320 \text{ pN} \cdot \text{nm}$  and surface tension at the edge is  $\lambda_0 = 0.02 \text{ pN/nm}$ . Axial traction does not play any role in invagination. (A) Axial traction along the membrane is negligible for all shapes. (B) Axial force at the interface is almost zero. Terms due to tension and curvature gradient cancel each other and force due to curvature is automatically zero. (C) Radial traction distribution for three shapes. A large negative radial traction at the neck should favor membrane scission.

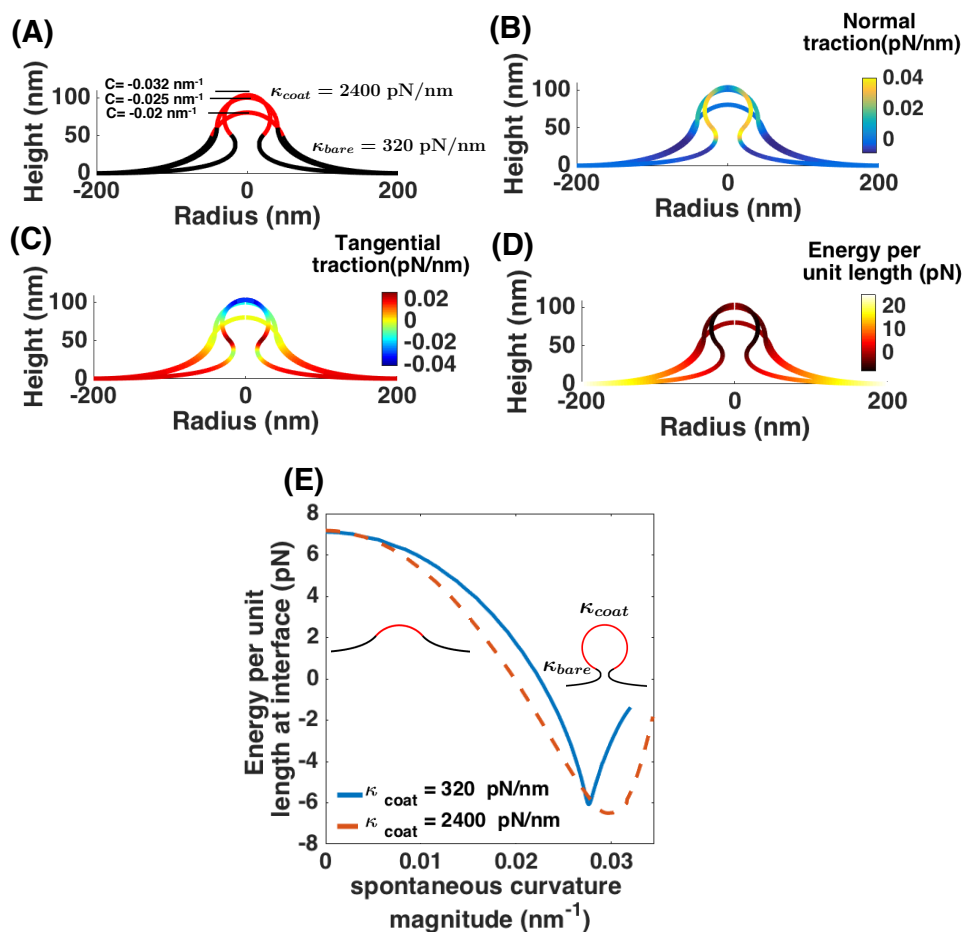

Figure S5: Analysis of membrane budding due to protein-induced spontaneous curvature with a rigid coat. Simulations for Fig. 5 is repeated for  $\kappa_{coat} = 2400 \text{ pN/nm}$  and  $\kappa = 320 \text{ pN/nm}$ . (A) Membrane shapes for same three spontaneous curvature as Fig. 5 A. (B) Normal traction along the membrane for the shapes shown in (A). (C) Tangential traction distribution (D) Energy per unit length distribution for the chosen shapes. (E) Energy per unit length at the edge of the edge of the spontaneous curvature field as a function of spontaneous curvature for the homogeneous membrane in Fig. 5 (blue solid line) and a rigid protein coat (red dashed line). In large values of spontaneous curvature ( $\Omega$ -shaped bud) the average difference between the line tension magnitudes is almost 4 pN.

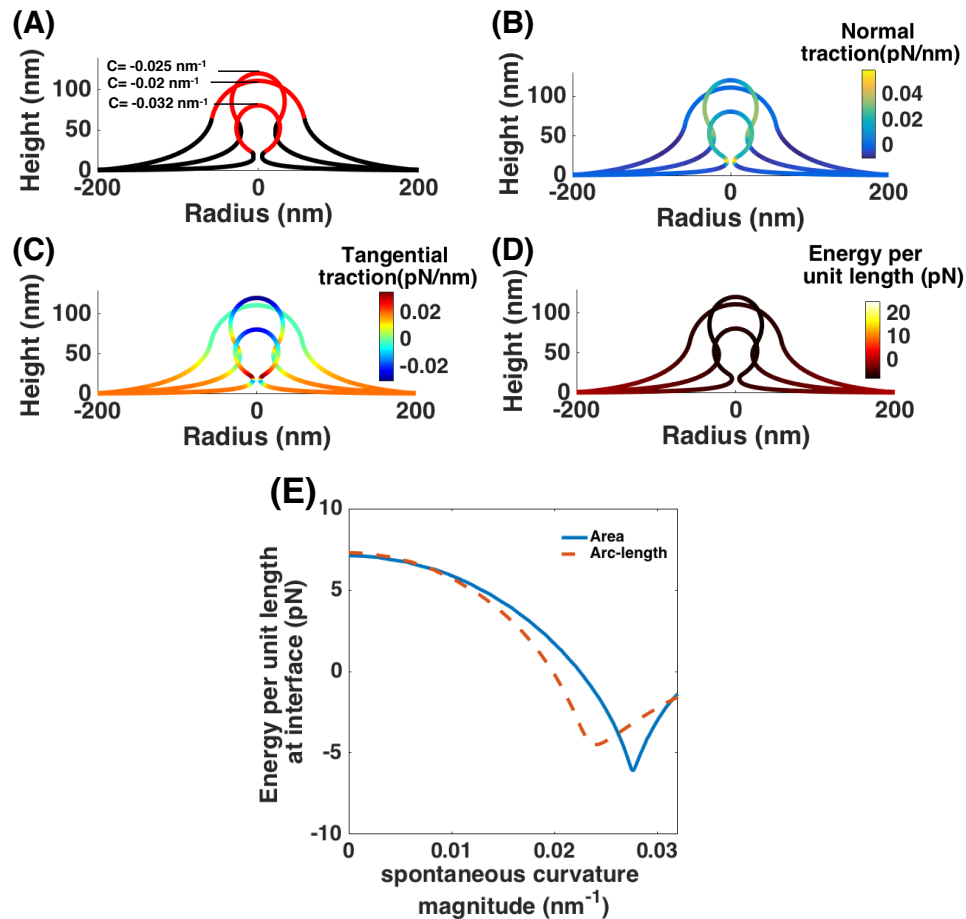

Figure S6: Budding simulation with protein-induced spontaneous curvature for a fixed arc length instead of a fixed membrane area. (A) Three different membrane shapes with increasing spontaneous curvature. (B-D) Normal traction, tangential traction and energy per unit length distribution along the observed shapes in panel (A). (E) Energy per unit length at the edge of the protein coat. Blue solid line is for the fixed membrane area (Fig. 6) and the red dashed line represents the case with constant arc length.

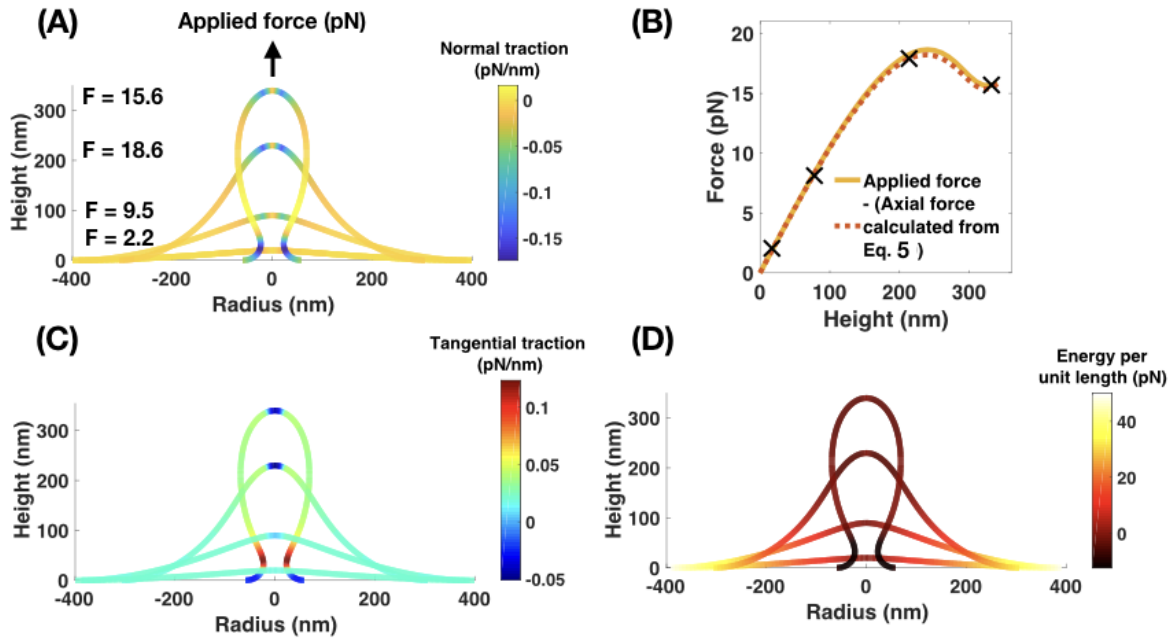

Figure S7: Tether pulling simulation with a point force for a fixed arc length instead of a fixed membrane area. Bending modulus  $\kappa = 320 \text{ pN} \cdot \text{nm}$ , surface tension at the boundary ( $\lambda_0 = 0.02 \text{ pN/nm}$ ). (A) Normal traction distribution along four chosen membrane shapes. (B) Match obtained between applied force and axial force calculated from Eq. S29 plotted vs height of the tether. (C) Tangential traction distribution along the membrane shapes in (A). (D) Energy per unit length (Eq. S31) along the membrane shapes in (A).

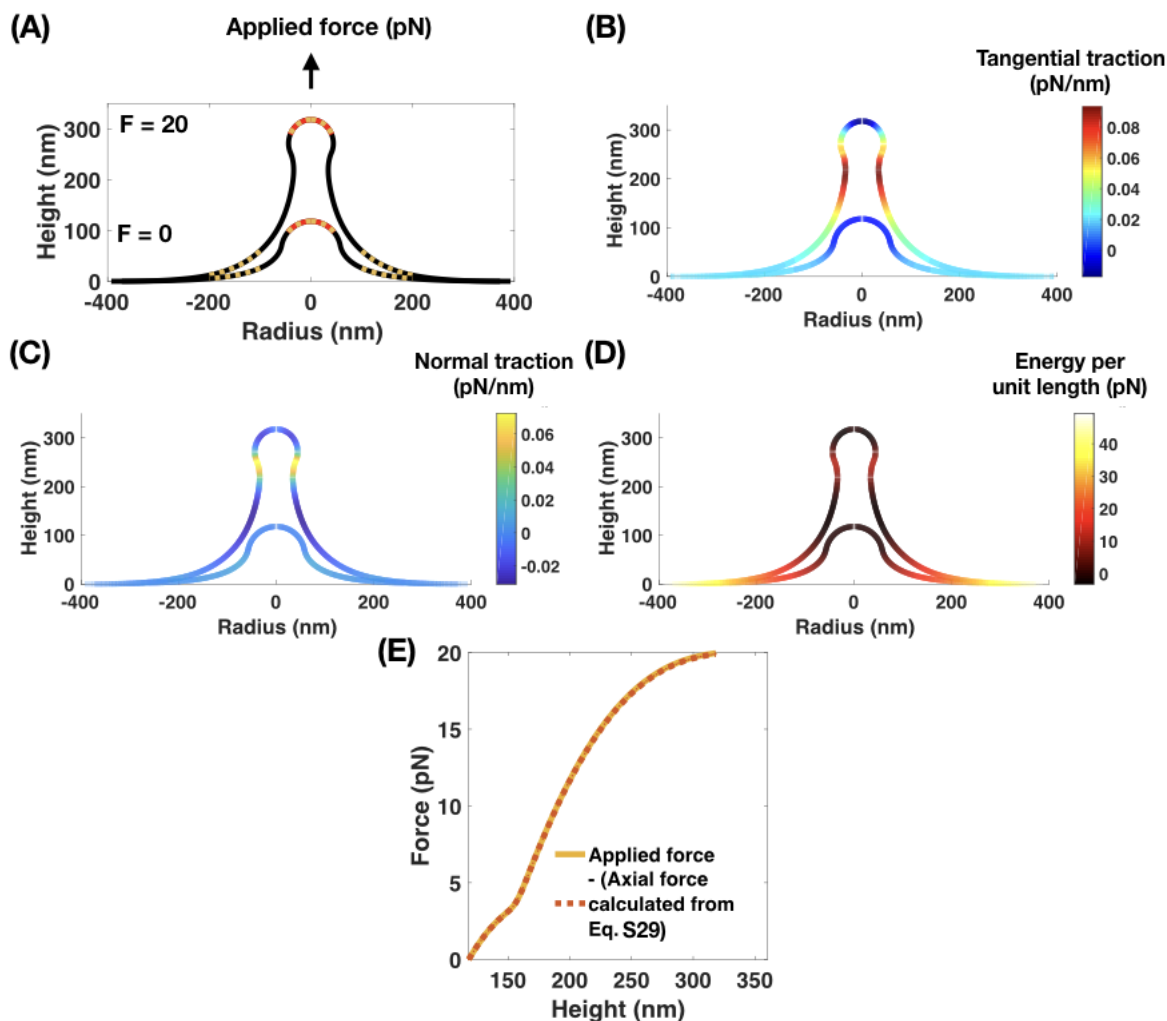

Figure S8: Application of axial forces (brown) onto a U-shaped bud covered by a protein coat (red). Spontaneous curvature magnitude  $C = -0.02 \text{ nm}^{-1}$ , area of spontaneous curvature field  $A = 17,593 \text{ nm}^2$ , bending modulus  $\kappa = 320 \text{ pN} \cdot \text{nm}$  and surface tension at the edge  $\lambda_0 = 0.02 \text{ pN/nm}$ . Here, axial forces are applied such that there is an upward force over the protein coat and a downward force acting as a ring at the base [13]. (A) Initial and final membrane shapes obtained. (B) Tangential traction distribution along the membrane shapes in (A). (C) Normal traction distribution along the membrane shapes in (A). (D) Energy per unit length along the membrane shapes in (A). (E) Force match obtained between applied force and negative of axial force calculated using Eq. S29. Here, axial force is calculated at the edge of the protein coat. Axial force at the base is zero since the upward and downward forces balance each other out.

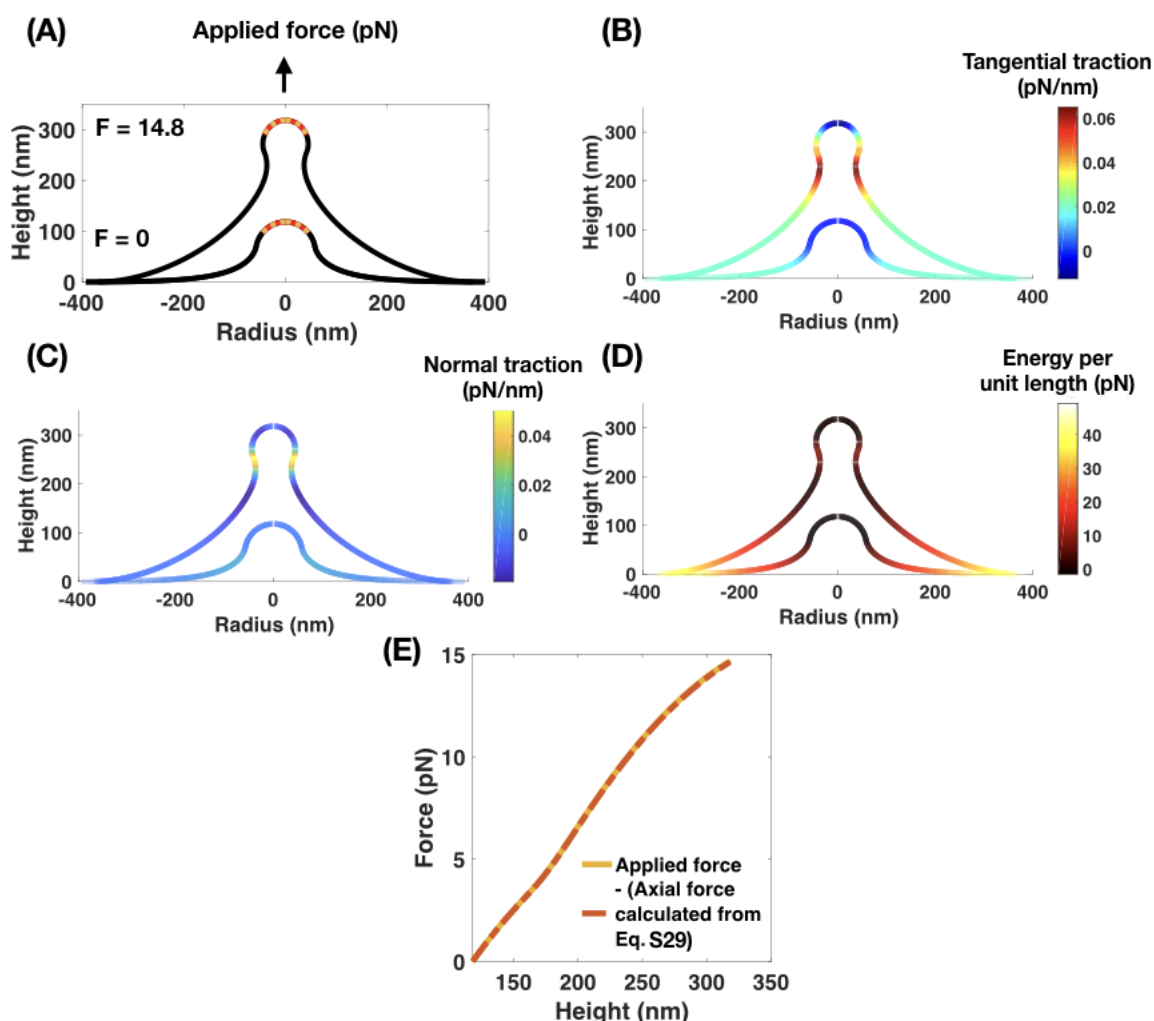

Figure S9: Application of axial forces (brown) onto a U-shaped bud covered by a protein coat (red). Spontaneous curvature magnitude  $C = -0.02 \text{ nm}^{-1}$ , area of spontaneous curvature field  $A = 17,593 \text{ nm}^2$ , bending modulus  $\kappa = 320 \text{ pN} \cdot \text{nm}$  and surface tension at the edge  $\lambda_0 = 0.02 \text{ pN/nm}$ . Here, axial forces are applied such that there is only an upward force over the protein coat. (A) Initial and final membrane shapes obtained. Force required is smaller than Fig. S8. (B) Tangential traction distribution along the membrane shapes in (A). (C) Normal traction distribution along the membrane shapes in (A). (D) Energy per unit length along the membrane shapes in (A). (E) Force match obtained between applied force and negative of axial force calculated using Eq. S29. Here, axial force is calculate at the base of the membrane. The same match can be obtained at the edge of the protein coat.



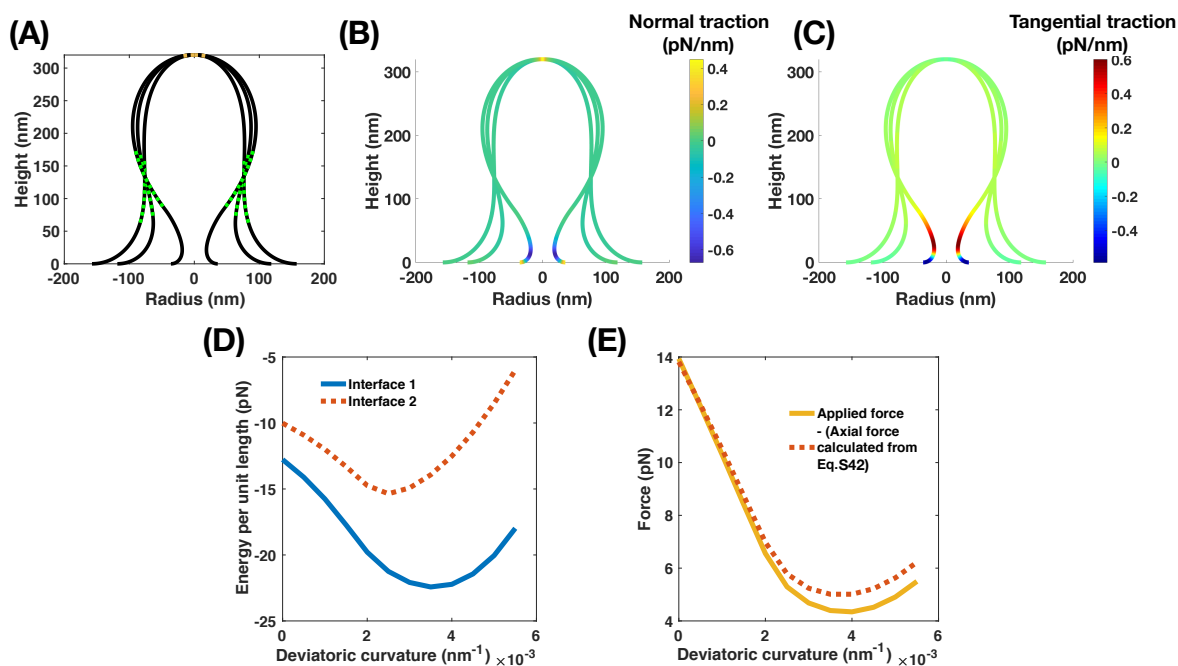

Figure S10: Application of a deviatoric spontaneous curvature along the cylindrical portion of a membrane tube leads to neck formation [20]. The simulation was performed by first pulling out a membrane tube of fixed arc length, followed by application of both spontaneous curvature and deviatoric curvature for a fixed height of membrane tube. Arc length of the deviatoric spontaneous curvature field  $s = 5 \text{ nm}$ , bending modulus  $\kappa = 320 \text{ pN} \cdot \text{nm}$  and surface tension at the edge  $\lambda_0 = 0.02 \text{ pN/nm}$ . (A) Membrane shapes at a spontaneous curvature  $C = 0 \text{ nm}^{-1}$ ,  $C = -0.004 \text{ nm}^{-1}$ ,  $C = -0.01 \text{ nm}^{-1}$  and deviatoric spontaneous curvature  $D = 0 \text{ nm}^{-1}$ ,  $D = 0.004 \text{ nm}^{-1}$ ,  $D = 0.01 \text{ nm}^{-1}$  respectively. (B) Normal traction distribution along the membrane shapes in (A). (C) Tangential traction distribution along the membrane shapes in (A). (D) Energy per unit length at both interfaces with increasing deviatoric curvature. The trend of energy per unit length resembles the trend leading up to neck formation in Fig 5. (E) Match between applied force and axial force calculated using Eq. S42. Axial force relaxes with membrane neck formation.

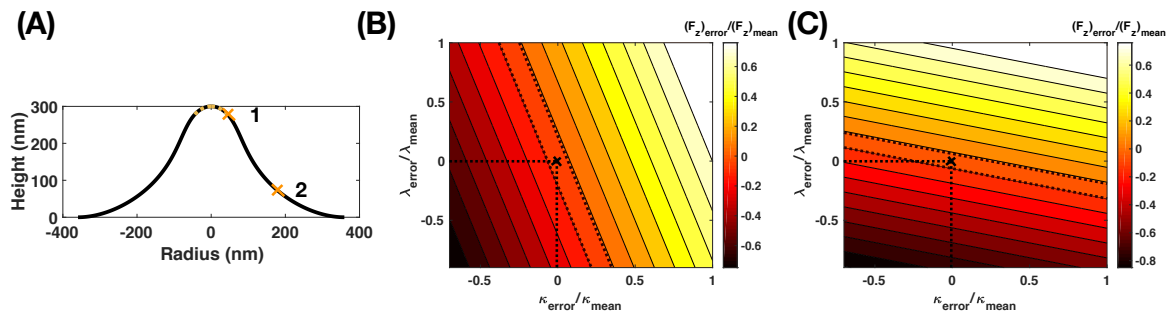

Figure S11: Location dependence of the sensitivity analysis to axial force calculation from a single simulation of a membrane tube. Dashed lines indicated 10 % error. (A) Membrane shape at a mean value of  $\kappa = 320$  pN.nm,  $\lambda_0 = 0.02$  pN/nm,  $-F_z$  (brown) = 18.0167 pN (corresponding to a tube of height 300 nm in Fig. 3). The cross marks (labeled 1 and 2) indicate the locations where axial force is calculated. (B) Error in  $F_z$  calculated at point 1 (edge of the area of applied force). (C) Error in  $F_z$  calculated at point 2 (location of zero mean curvature). Error in  $F_z$  due to error in membrane tension  $\lambda$  increases near the curved portions of the PM invagination.

## 300 References

- 301 1. W. Helfrich. Elastic properties of lipid bilayers: theory and possible experiments. *Zeitschrift für*  
302 *Naturforschung C*, 28(11-12):693–703, 1973.
- 303 2. S. E. Miller, S. Mathiasen, N. A. Bright, F. Pierre, B. T. Kelly, N. Kladt, A. Schauss, C. J. Merri-  
304 field, D. Stamou, S. Höning, et al. Calm regulates clathrin-coated vesicle size and maturation by  
305 directly sensing and driving membrane curvature. *Developmental cell*, 33(2):163–175, 2015.
- 306 3. D. Steigmann, E. Baesu, R. E. Rudd, J. Belak, and M. McElfresh. On the variational theory of  
307 cell-membrane equilibria. *Interfaces and Free Boundaries*, 5(4):357–366, 2003.
- 308 4. D. Steigmann. Fluid films with curvature elasticity. *Archive for Rational Mechanics and Analysis*,  
309 150(2):127–152, 1999.
- 310 5. W. Rawicz, K. Olbrich, T. McIntosh, D. Needham, and E. Evans. Effect of chain length and  
311 unsaturation on elasticity of lipid bilayers. *Biophysical journal*, 79(1):328–339, 2000.
- 312 6. P. Rangamani, A. Agrawal, K. K. Mandadapu, G. Oster, and D. J. Steigmann. Interaction between  
313 surface shape and intra-surface viscous flow on lipid membranes. *Biomechanics and modeling in*  
314 *mechanobiology*, pages 1–13, 2013.
- 315 7. P. Rangamani, K. K. Mandadap, and G. Oster. Protein-induced membrane curvature alters local  
316 membrane tension. *Biophysical journal*, 107(3):751–762, 2014.
- 317 8. N. Walani, J. Torres, and A. Agrawal. Anisotropic spontaneous curvatures in lipid membranes.  
318 *Physical Review E*, 89(6):062715, 2014.
- 319 9. A. Iglič, H. Hägerstrand, P. Veranič, A. Plemenitaš, and V. Kralj-Iglič. Curvature-induced ac-  
320 cumulation of anisotropic membrane components and raft formation in cylindrical membrane  
321 protrusions. *Journal of Theoretical Biology*, 240(3):368–373, 2006.
- 322 10. M. Lokar, D. Kabaso, N. Resnik, K. Sepčić, V. Kralj-Iglič, P. Veranič, R. Zorec, and A. Iglič.  
323 The role of cholesterol-sphingomyelin membrane nanodomains in the stability of intercellular  
324 membrane nanotubes. *International journal of nanomedicine*, 7:1891, 2012.
- 325 11. A. Agrawal and D. J. Steigmann. Boundary-value problems in the theory of lipid membranes.  
326 *Continuum Mechanics and Thermodynamics*, 21(1):57–82, 2009.
- 327 12. N. Walani, J. Torres, and A. Agrawal. Endocytic proteins drive vesicle growth via instabil-  
328 ity in high membrane tension environment. *Proceedings of the National Academy of Sciences*,  
329 112(12):E1423–E1432, 2015.
- 330 13. J. E. Hassinger, G. Oster, D. G. Drubin, and P. Rangamani. Design principles for robust vesic-  
331 ulation in clathrin-mediated endocytosis. *Proceedings of the National Academy of Sciences*,  
332 114(7):E1118–E1127, 2017.
- 333 14. H. Alimohamadi, R. Vasan, J. Hassinger, J. Stachowiak, and P. Rangamani. The role of traction  
334 in membrane curvature generation. *Biophysical Journal*, 114(3):600a, 2018.

- 335 15. H. Alimohamadi, B. Ovrzyn, and P. Rangamani. Protein-mediated beads-on-a-string structure  
336 formation along membrane nanotubes in live cells. *Biophysical Journal*, 114(3):392a, 2018.
- 337 16. S. Dmitrieff and F. Nédélec. Membrane mechanics of endocytosis in cells with turgor. *PLoS*  
338 *computational biology*, 11(10):e1004538, 2015.
- 339 17. I. Derényi, F. Jülicher, and J. Prost. Formation and interaction of membrane tubes. *Physical*  
340 *review letters*, 88(23):238101, 2002.
- 341 18. R. Basu, E. L. Munteanu, and F. Chang. Role of turgor pressure in endocytosis in fission yeast.  
342 *Molecular biology of the cell*, 25(5):679–687, 2014.
- 343 19. A. J. Jin, K. Prasad, P. D. Smith, E. M. Lafer, and R. Nossal. Measuring the elasticity of clathrin-  
344 coated vesicles via atomic force microscopy. *Biophysical journal*, 90(9):3333–3344, 2006.
- 345 20. A. Picco, M. Mund, J. Ries, F. Nedelec, and M. Kaksonen. Visualizing the functional architecture  
346 of the endocytic machinery. *Elife*, 4, 2015.
